# Supplementary material for: Effect of Drought Stress on Degradation and Remodeling of Membrane Lipids in Nostoc flagelliforme
Source: Foods. 2022 Jun 18;11(12):1798. doi: 10.3390/foods11121798 (PMC9222375; doi:10.3390/foods11121798)
Supplement: Supplementary file 1 [file foods-11-01798-s001.zip › foods-1748471 Supplementary table R2.xlsx]

## Sheet: S1
Table S1 The all lipids molecular species were identified and quantified in N. flagelliforme under drought stress
LA, LB, LC, and LD represent samples with 0%, 30%, 75%, and 100% water loss, respectively. Data are the means of eight independent biological samples.
Quality control (QC) samples were prepared by pooling an aliquot from each lipid sample, and used to monitor and evaluate the stability and reliability of the experimental data.
Name	LipidGroup	IonFormula	CalMz	RT-(min)	P-value	LA	LB	LC	LD	QC
Glycerolipids
DG	DG(25:3)+Na	C28 H48 O5 Na1	487.339	14.192	1.23001e-10	7.84279e+06	9.43846e+06	6.80338e+06	646079	8.67757e+06
	DG(27:1)+Na	C30 H56 O5 Na1	519.402	6.83132	0.00143345	1.2612e+07	1.84254e+07	1.48288e+07	5.51953e+06	1.94864e+07
	DG(29:0)+Na	C32 H62 O5 Na1	549.449	10.1071	0.000321594	1.87273e+07	3.73587e+07	3.69638e+07	1.23263e+07	4.7448e+07
	DG(29:1)+Na	C32 H60 O5 Na1	547.433	7.98566	0.000512872	7.58981e+09	1.31432e+10	9.64862e+09	3.75299e+09	13959925896
	DG(29:1)+Na	C32 H60 O5 Na1	547.433	11.9386	7.56122e-11	1.61647e+08	2.64326e+08	2.30456e+08	1.16805e+07	2.5657e+08
	DG(29:1)+Na	C32 H60 O5 Na1	547.433	12.8955	7.2837e-11	1.3908e+08	1.97735e+08	1.67412e+08	1.03084e+07	1.83804e+08
	DG(30:0)+Na	C33 H64 O5 Na1	563.465	15.0542	0.000793019	3.86783e+06	5.21173e+06	9.38335e+06	2.60499e+06	7.24158e+06
	DG(30:1)+Na	C33 H62 O5 Na1	561.449	8.97825	0.00498186	2.68589e+08	5.21925e+08	5.60628e+08	3.23444e+08	6.09572e+08
	DG(30:3)+H	C33 H59 O5	535.436	8.53111	0.00166668	1.06075e+07	1.61707e+07	1.21615e+07	6.00313e+06	1.93473e+07
	DG(31:1)+Na	C34 H64 O5 Na1	575.465	12.882	3.64034e-10	7.76612e+07	1.28449e+08	1.00378e+08	5.5951e+06	1.22919e+08
	DG(31:1)+Na	C34 H64 O5 Na1	575.465	13.9447	1.6442e-09	5.72867e+07	8.31337e+07	6.5917e+07	5.39666e+06	7.97094e+07
	DG(31:3)+NH4	C34 H64 O5 N1	566.478	9.0817	9.02317e-05	3.05723e+08	4.22698e+08	2.18167e+08	6.93008e+07	3.83222e+08
	DG(31:4)+H	C34 H59 O5	547.436	7.98348	0.00392813	5.0788e+07	1.05805e+08	8.47018e+07	4.77578e+07	1.05072e+08
	DG(31:4)+NH4	C34 H62 O5 N1	564.462	7.98348	0.00040376	1.87141e+09	3125774793	2348952355	8.49294e+08	3.16601e+09
	DG(31:4)+H	C34 H59 O5	547.436	8.8801	0.0003667	4.90226e+07	1.14718e+08	1.20673e+08	4.04583e+07	1.32807e+08
	DG(31:4)+H	C34 H59 O5	547.436	9.96265	0.020415	9.82406e+06	2.30846e+07	1.73731e+07	1.00181e+07	2.68221e+07
	DG(32:0)+Na	C35 H68 O5 Na1	591.496	10.0213	2.17631e-20	1.07204e+07	1.5291e+07	6.05751e+07	2.06064e+09	4.93507e+08
	DG(32:1)+Na	C35 H66 O5 Na1	589.48	9.04803	6.49848e-18	2.59038e+07	2.11572e+07	1.69725e+08	4.93919e+09	1.92848e+09
	DG(32:1p)+Na	C35 H66 O4 Na1	573.485	8.431	2.47804e-11	1.14695e+07	1.48481e+07	1.08389e+07	3.7902e+08	7.68344e+07
	DG(32:4)+NH4	C35 H64 O5 N1	578.478	8.975	0.00577239	2.60045e+08	5.08924e+08	5.48025e+08	3.05063e+08	5.96284e+08
	DG(33:0)+Na	C36 H70 O5 Na1	605.512	10.517	7.36692e-07	2.25543e+06	5.45452e+06	3.74012e+06	9.86861e+06	7.5142e+06
	DG(33:3)+NH4	C36 H68 O5 N1	594.509	9.08234	1.62003e-06	2.1383e+09	2269144783	1.47723e+09	1.81453e+08	1.13285e+09
	DG(33:4)+NH4	C36 H66 O5 N1	592.494	7.97465	0.000252385	5.98098e+09	6.62137e+09	5.99392e+09	2.21811e+09	6.27637e+09
	DG(33:4)+NH4	C36 H66 O5 N1	592.494	8.767	0.000623541	8.33221e+07	1.52774e+08	1.29787e+08	6.96268e+07	1.49445e+08
	DG(33:4)+NH4	C36 H66 O5 N1	592.494	9.11632	2.32856e-05	5.4653e+08	9.2182e+08	6.22537e+08	2.31649e+08	9.51562e+08
	DG(33:5)+NH4	C36 H64 O5 N1	590.478	8.215	1.79058e-11	1.51508e+07	4.16306e+07	7.21987e+07	3.352e+08	1.04001e+08
	DG(33:6)+NH4	C36 H62 O5 N1	588.462	4.95199	0.00737718	8.46007e+06	1.76516e+07	1.23804e+07	1.68112e+07	1.70508e+07
	DG(33:6)+NH4	C36 H62 O5 N1	588.462	7.375	0.00105655	2.94771e+07	1.79689e+08	4.68161e+08	1.74048e+08	3.10956e+08
	DG(34:1)+H	C37 H71 O5	595.53	11.4674	1.00127e-15	5.75113e+06	4.04554e+06	2.6109e+07	1.89505e+08	7.15293e+07
	DG(34:1)+NH4	C37 H74 O5 N1	612.556	11.4674	6.72156e-15	3.98777e+06	2.86365e+06	1.90516e+07	1.4214e+08	5.25544e+07
	DG(34:1e)+Na	C37 H72 O4 Na1	603.532	20.9658	8.2521e-10	2.24576e+06	2.38887e+06	6.56582e+06	6.85265e+06	7.3811e+06
	DG(34:1p)+H	C37 H71 O4	579.535	12.503	2.53827e-13	1.24156e+06	1.47202e+06	3.5753e+06	1.76925e+07	7.01784e+06
	DG(34:2)+NH4	C37 H72 O5 N1	610.541	10.5536	0.044269	8.147e+07	1.11281e+08	1.53666e+08	1.78158e+08	1.44812e+08
	DG(34:2)+NH4	C37 H72 O5 N1	610.541	11.8917	0.000546947	2.17001e+06	4.38268e+06	3.78669e+06	1.08159e+07	6.42922e+06
	DG(34:2p)+H	C37 H69 O4	577.519	9.97325	1.70778e-12	3.23731e+07	2.78239e+07	6.71356e+07	5.91793e+08	2.05457e+08
	DG(34:3)+H	C37 H67 O5	591.498	8.72343	1.97319e-12	1.83567e+06	2.89487e+06	1.23341e+07	5.00125e+07	2.14019e+07
	DG(34:3)+NH4	C37 H70 O5 N1	608.525	9.51493	0.000772981	4.36825e+08	5.51149e+08	6.48744e+08	2.33709e+08	5.34252e+08
	DG(34:4)+H	C37 H65 O5	589.483	7.75041	5.11744e-15	5.44145e+06	6.98069e+06	4.09005e+07	3.59438e+08	9.74873e+07
	DG(34:4)+NH4	C37 H68 O5 N1	606.509	8.28475	4.90885e-11	1.38859e+07	3.08334e+07	2.44601e+07	9.28018e+07	5.19606e+07
	DG(34:4)+H	C37 H65 O5	589.483	8.28475	8.3146e-18	6.39442e+06	6.72313e+06	4.34289e+07	9.65413e+08	2.53615e+08
	DG(34:4)+NH4	C37 H68 O5 N1	606.509	8.57223	5.94795e-05	1.20995e+08	1.70294e+08	1.29835e+08	4.58653e+07	1.61988e+08
	DG(34:4)+NH4	C37 H68 O5 N1	606.509	9.01208	0.0177494	1.15579e+09	1.64132e+09	1.89184e+09	1.15397e+09	1718855358
	DG(34:4)+NH4	C37 H68 O5 N1	606.509	10.0381	0.0170267	7.03365e+07	1.61972e+08	1.55924e+08	1.01158e+08	1.89393e+08
	DG(34:5)+H	C37 H63 O5	587.467	6.08354	6.00798e-07	1.5599e+06	2.93698e+06	1.4493e+07	1.90007e+07	1.53789e+07
	DG(35:5)+NH4	C38 H68 O5 N1	618.509	8.213	0.0149343	7.83009e+07	2.32131e+08	4.11441e+08	1.81947e+08	3.44565e+08
	DG(36:2)+NH4	C39 H76 O5 N1	638.572	11.4613	0.00490567	4.79466e+06	4.74257e+06	7.03437e+06	1.05677e+07	1.00648e+07
	DG(36:3)+NH4	C39 H74 O5 N1	636.556	10.6037	0.00303896	1.05586e+08	1.26237e+08	1.67972e+08	7.58058e+07	1.5037e+08
	DG(36:3)+H	C39 H71 O5	619.53	10.8746	1.57545e-15	899029	1.47092e+06	3.61234e+06	6.31236e+07	1.43806e+07
	DG(36:4)+NH4	C39 H72 O5 N1	634.541	10.0548	2.24776e-05	3.37531e+08	5.6668e+08	5.60128e+08	1.70293e+08	4.27457e+08
	DG(36:5)+NH4	C39 H70 O5 N1	632.525	9.25058	9.48029e-07	1.23449e+07	2.65601e+07	6.82604e+07	8.18553e+07	4.20695e+07
	DG(36:5)+H	C39 H67 O5	615.498	9.25058	1.29771e-17	1.06855e+06	833669	7.75328e+06	4.99794e+08	1.0054e+08
	DG(36:6)+H	C39 H65 O5	613.483	7.18326	4.2188e-13	2.29577e+06	2.34301e+06	1.19785e+07	7.14126e+07	2.15631e+07
	DG(36:6)+NH4	C39 H68 O5 N1	630.509	8.46216	1.95201e-06	2.80674e+07	9.74728e+07	3.39164e+08	4.1776e+08	2.27145e+08
	DG(36:6)+H	C39 H65 O5	613.483	8.46216	1.70549e-19	2.64401e+06	1.83928e+06	1.68293e+07	1.46376e+09	3.19981e+08
	DG(30:3)+H	C33 H59 O5	535.436	8.00018	0.0802224	1.19958e+07	1.65612e+07	1.35798e+07	9.07757e+06	1.95816e+07
	DG(31:4)+H	C34 H59 O5	547.436	10.343	0.0652216	1.00008e+07	1.92551e+07	1.94788e+07	1.52102e+07	2.40758e+07
	DG(32:0e)+Na	C35 H70 O4 Na1	577.517	26.632	0.920346	4.72314e+07	5.18601e+07	4.77332e+07	5.37461e+07	6.54477e+07
	DG(34:1p)+H	C37 H71 O4	579.535	21.7022	0.593641	3.47519e+07	3.39899e+07	3.48262e+07	3.58569e+07	3.26386e+07
	DG(34:1p)+H	C37 H71 O4	579.535	22.9743	0.979293	6.61498e+07	6.40147e+07	6.42761e+07	6.31164e+07	9.06287e+07
	DG(34:1p)+H	C37 H71 O4	579.535	23.767	0.176296	5.30369e+07	4.12266e+07	6.6043e+07	3.56731e+07	5.99324e+07
	DG(34:1p)+H	C37 H71 O4	579.535	24.2105	0.327797	5.95045e+07	5.10945e+07	7.40174e+07	5.64166e+07	4.73606e+07
	DG(34:1p)+H	C37 H71 O4	579.535	25.056	0.422128	7.14142e+07	3.69498e+07	5.53179e+07	5.07446e+07	4.82551e+07
	DG(34:1p)+H	C37 H71 O4	579.535	26.2459	0.676182	8.43277e+07	8.98232e+07	7.3038e+07	1.02209e+08	8.09549e+07
	DG(34:1p)+H	C37 H71 O4	579.535	26.6473	0.84519	7.5617e+07	7.23436e+07	7.70984e+07	6.92906e+07	8.04388e+07
	DG(34:1p)+H	C37 H71 O4	579.535	27.0114	0.927764	1.04697e+08	9.9952e+07	9.80565e+07	1.12532e+08	8.3618e+07
	DG(34:1p)+H	C37 H71 O4	579.535	27.6531	0.852081	6.80413e+07	6.05168e+07	6.01951e+07	6.20686e+07	6.91185e+07
	DG(34:1p)+H	C37 H71 O4	579.535	28.198	0.394126	7.16822e+07	6.45125e+07	6.2167e+07	5.75192e+07	6.34416e+07
	DG(34:1p)+H	C37 H71 O4	579.535	28.5704	0.268104	7.39445e+07	6.53358e+07	5.75908e+07	6.34523e+07	5.92388e+07
	DG(34:2p)+H	C37 H69 O4	577.519	22.3528	0.471199	1.06832e+08	1.05354e+08	1.03889e+08	1.02032e+08	1.01116e+08
	DG(34:2p)+H	C37 H69 O4	577.519	22.949	0.823304	1.80084e+07	2.08179e+07	1.75868e+07	1.8696e+07	2.04916e+07
	DG(34:2p)+H	C37 H69 O4	577.519	23.779	0.903338	2.21304e+07	2.18487e+07	2.00665e+07	1.99096e+07	2.06249e+07
	DG(34:2p)+H	C37 H69 O4	577.519	26.9105	0.63729	5.70708e+07	4.98418e+07	4.41505e+07	5.18716e+07	4.32583e+07
	DG(34:2p)+H	C37 H69 O4	577.519	29.426	0.754333	1.08832e+08	1.44946e+08	1.37884e+08	1.39994e+08	2.27887e+08
	DG(34:3)+NH4	C37 H70 O5 N1	608.525	9.90666	0.349668	3.68566e+08	4.28746e+08	5.56731e+08	3.6154e+08	3.80386e+08
	DG(34:3p)+H	C37 H67 O4	575.503	21.682	0.24516	2.06223e+07	1.99596e+07	2.15349e+07	2.02416e+07	1.7035e+07
	DG(34:4)+NH4	C37 H68 O5 N1	606.509	7.75041	0.193333	3.86397e+07	3.82534e+07	4.01523e+07	2.96647e+07	2.64976e+07
	DG(36:2)+NH4	C39 H76 O5 N1	638.572	12.8257	0.161139	3.66138e+06	3.27401e+06	6.38947e+06	9.56561e+06	7.64988e+06
	DG(36:2p)+H	C39 H73 O4	605.55	22.3426	0.426866	5.10164e+07	5.13083e+07	4.95127e+07	5.00514e+07	4.79114e+07
	DG(36:2p)+H	C39 H73 O4	605.55	22.9526	0.63248	1.57809e+07	1.50514e+07	1.58339e+07	1.5064e+07	1.58118e+07
	DG(36:7)+H	C39 H63 O5	611.467	7.05883	0.587885	7.40602e+07	7.86419e+07	7.93578e+07	8.03332e+07	8.17822e+07
TG	TG(37:5)+NH4	C40 H70 O6 N1	660.52	5.34692	2.79407e-05	8.89922e+06	1.59057e+07	1.866e+07	3.74384e+06	1.20422e+07
	TG(38:2)+NH4	C41 H78 O6 N1	680.582	9.21978	0.0404319	2.65788e+07	5.56328e+07	3.48267e+07	2.37108e+07	4.98258e+07
	TG(38:5)+NH4	C41 H72 O6 N1	674.535	6.31713	0.0047413	2.26943e+06	4.45529e+06	5.1871e+06	5.00529e+06	4.6537e+06
	TG(40:0)+NH4	C43 H86 O6 N1	712.645	16.7194	0.00155872	641361	1.47829e+06	425249	2.36125e+06	1.38613e+06
	TG(41:8)+Na	C44 H68 O6 Na1	715.491	9.115	0.000338513	8.76057e+06	1.14582e+07	1.61065e+07	2.10564e+07	1.55843e+07
	TG(42:0)+NH4	C45 H90 O6 N1	740.676	18.0479	1.05257e-05	1.22948e+06	2.94885e+06	1.47436e+06	6.88156e+06	3.39707e+06
	TG(44:0)+NH4	C47 H94 O6 N1	768.708	19.4267	9.33073e-06	4.83106e+06	6.34394e+06	4.805e+06	1.25185e+07	6.57162e+06
	TG(45:0)+NH4	C48 H96 O6 N1	782.723	19.7994	1.01988e-05	1.45912e+06	2.1986e+06	1.35871e+06	6.39291e+06	2.93634e+06
	TG(46:0)+NH4	C49 H98 O6 N1	796.739	20.459	3.38927e-05	8.61001e+06	1.00045e+07	7.08923e+06	2.12237e+07	1.37122e+07
	TG(46:1)+NH4	C49 H96 O6 N1	794.723	19.3985	9.137e-05	976547	3.34683e+06	2.41698e+06	7.99227e+06	4.0086e+06
	TG(47:0)+NH4	C50 H100 O6 N1	810.755	20.9569	3.11915e-05	2.35277e+06	3.48847e+06	2.47374e+06	8.99983e+06	5.57009e+06
	TG(47:3)+NH4	C50 H94 O6 N1	804.708	17.4944	0.000133303	611206	1.81316e+06	1.20854e+06	3.21026e+06	1.51774e+06
	TG(48:1)+NH4	C51 H100 O6 N1	822.755	20.6411	0.0159895	1.14374e+07	1.88322e+07	1.58518e+07	2.22677e+07	1.75476e+07
	TG(48:2)+NH4	C51 H98 O6 N1	820.739	19.4268	0.0295195	1.53259e+06	1.41331e+07	4.48513e+06	1.16129e+07	8.9027e+06
	TG(49:0)+NH4	C52 H104 O6 N1	838.786	22.0156	0.0436313	7.22284e+06	6.76928e+06	5.458e+06	9.1323e+06	1.07464e+07
	TG(50:1)+NH4	C53 H104 O6 N1	850.786	20.7299	0.00604777	1.77479e+07	2.56692e+07	3.7898e+07	6.0464e+07	2.61685e+07
	TG(50:2)+NH4	C53 H102 O6 N1	848.77	20.787	0.0462481	7.84452e+07	9.64915e+07	9.04098e+07	9.77521e+07	8.24556e+07
	TG(50:3)+NH4	C53 H100 O6 N1	846.755	19.3613	0.0408165	1.12559e+06	1.02594e+07	2.16866e+06	3.97798e+06	5.1343e+06
	TG(50:3)+NH4	C53 H100 O6 N1	846.755	19.8319	0.00284674	5.20797e+06	6.99223e+06	7.71836e+06	1.1966e+07	7.796e+06
	TG(50:4)+NH4	C53 H98 O6 N1	844.739	18.572	4.57825e-05	1.27872e+06	5.47257e+06	3.59476e+06	6.72852e+06	5.35465e+06
	TG(52:2)+NH4	C55 H106 O6 N1	876.801	15.9966	5.59151e-08	1.05642e+07	1.1688e+07	1.44856e+07	1.98615e+07	1.92241e+07
	TG(52:2)+NH4	C55 H106 O6 N1	876.801	27.6629	0.0212279	5.26345e+08	4.71957e+08	5.54497e+08	8.26166e+08	4.62774e+08
	TG(52:3)+NH4	C55 H104 O6 N1	874.786	20.969	0.00606736	6.76873e+07	7.1213e+07	7.57031e+07	7.86176e+07	6.48215e+07
	TG(52:4)+NH4	C55 H102 O6 N1	872.77	19.8108	1.15062e-05	6.27272e+06	1.0251e+07	1.58344e+07	2.74642e+07	1.74057e+07
	TG(52:5)+NH4	C55 H100 O6 N1	870.755	18.691	8.15615e-06	1.30309e+06	2.51483e+06	2.99429e+06	5.60044e+06	3.54665e+06
	TG(52:6)+NH4	C55 H98 O6 N1	868.739	17.7273	7.83872e-07	1.29276e+06	2.40216e+06	2.44535e+06	5.36052e+06	3.20771e+06
	TG(54:4)+NH4	C57 H106 O6 N1	900.801	19.8047	0.000568583	7.62297e+06	1.43911e+07	1.82462e+07	3.32846e+07	1.912e+07
	TG(54:4)+NH4	C57 H106 O6 N1	900.801	20.7719	0.000678453	6.66886e+06	8.6854e+06	1.74155e+07	2.5892e+07	1.59421e+07
	TG(54:4)+H	C57 H103 O6	883.775	22.3439	0.0115693	7.8157e+08	7.56631e+08	6.9121e+08	7.29063e+08	6.79967e+08
	TG(54:5)+NH4	C57 H104 O6 N1	898.786	19.745	2.31196e-05	2.78061e+06	4.49453e+06	1.04697e+07	1.79334e+07	9.15692e+06
	TG(54:5)+Na	C57 H100 O6 Na1	903.741	19.745	2.25823e-05	2.03397e+06	3.0556e+06	6.34044e+06	1.30659e+07	5.57813e+06
	TG(54:5)+H	C57 H101 O6	881.759	21.692	2.86455e-05	4.47364e+08	4.18831e+08	3.56734e+08	3.92059e+08	3.25793e+08
	TG(54:6)+Na	C57 H98 O6 Na1	901.726	18.661	2.83967e-07	967260	1.98268e+06	4.23293e+06	1.0645e+07	3.81787e+06
	TG(54:7)+H	C57 H97 O6	877.728	19.7849	3.06203e-05	5.72748e+06	7.94167e+06	9.4398e+06	2.06915e+07	9.97319e+06
	TG(56:1)+NH4	C59 H116 O6 N1	934.88	22.9481	0.0188982	1.35193e+08	1.17641e+08	1.25947e+08	1.15447e+08	1.21996e+08
	TG(56:4)+NH4	C59 H110 O6 N1	928.833	21.9954	3.38455e-05	1.54299e+07	1.56203e+07	1.64535e+07	1.99278e+07	1.46704e+07
	TG(63:3)+Na	C66 H122 O6 Na1	1033.91	22.696	4.17208e-12	3.07847e+07	4.2718e+07	7.47588e+07	1.38587e+08	8.93021e+07
	TG(65:7)+H	C68 H119 O6	1031.9	21.8201	1.90316e-11	1.11211e+08	1.41951e+08	2.38082e+08	4.15379e+08	2.65344e+08
	TG(31:2)+Na	C34 H60 O6 Na1	587.428	10.3698	0.0248309	1.32501e+07	2.82412e+07	2.30793e+07	1.12747e+07	3.11528e+07
	TG(31:3)+Na	C34 H58 O6 Na1	585.413	5.94634	0.000233602	1.33916e+08	2.12041e+08	1.74795e+08	5.46028e+07	2.1815e+08
	TG(31:3e)+Na	C34 H60 O5 Na1	571.433	12.301	1.65223e-05	2.50013e+06	5.98688e+06	1.313e+07	3.94852e+06	8.60255e+06
	TG(32:2)+NH4	C35 H66 O6 N1	596.488	6.57754	0.00115085	2.2045e+06	4.35428e+06	5.00737e+06	4.39677e+06	4.52677e+06
	TG(32:2p)+H	C35 H63 O5	563.467	9.50353	0.00492353	6.5615e+07	1.52018e+08	1.6558e+08	1.00042e+08	1.65646e+08
	TG(32:3p)+H	C35 H61 O5	561.451	8.56328	4.02306e-05	8.65825e+07	1.41027e+08	9.81404e+07	3.25054e+07	1.48848e+08
	TG(33:1e)+Na	C36 H68 O5 Na1	603.496	9.87211	0.00689651	1.48021e+07	3.50383e+07	1.73867e+07	3.4318e+07	3.46079e+07
	TG(33:3p)+H	C36 H63 O5	575.467	9.122	1.43798e-05	1.91724e+09	3185692141	2.21903e+09	8.35804e+08	3295228444
	TG(33:4)+NH4	C36 H64 O6 N1	606.473	3.74269	0.000203999	3.38172e+06	9.35414e+06	1.4195e+07	1.21789e+07	9.29057e+06
	TG(33:4)+NH4	C36 H64 O6 N1	606.473	4.95145	0.00880611	2.59461e+07	5.34552e+07	4.99805e+07	3.09157e+07	5.94974e+07
	TG(33:4)+H	C36 H61 O6	589.446	4.95145	0.00175246	5.96972e+06	1.23576e+07	1.07805e+07	1.38449e+07	1.35104e+07
	TG(33:4)+NH4	C36 H64 O6 N1	606.473	5.50608	0.000825386	1.68336e+07	2.01176e+07	1.53465e+07	6.97594e+06	2.28546e+07
	TG(33:4e)+H	C36 H63 O5	575.467	8.82638	1.28897e-07	1.05607e+08	1.91286e+08	1.63981e+08	4.19952e+07	1.80822e+08
	TG(33:5)+H	C36 H59 O6	587.431	4.26297	0.00181787	1.49289e+07	3.24693e+07	3.04044e+07	3.86492e+07	3.74624e+07
	TG(33:5)+NH4	C36 H62 O6 N1	604.457	4.26297	0.0115405	7.12789e+07	1.58728e+08	1.40958e+08	8.96737e+07	1.77394e+08
	TG(33:5)+H	C36 H59 O6	587.431	6.10068	0.00011437	3.37821e+07	1.17036e+08	6.66639e+07	2.03279e+07	8.05922e+07
	TG(33:5)+H	C36 H59 O6	587.431	6.50053	4.00684e-05	1.12942e+07	1.69528e+07	1.37657e+07	4.63834e+06	1.73297e+07
	TG(33:5e)+H	C36 H61 O5	573.451	7.95064	0.000103776	2.6588e+07	1.37631e+08	3.1498e+08	1.88956e+08	2.6458e+08
	TG(33:5e)+H	C36 H61 O5	573.451	8.21671	0.0292031	5.27573e+07	1.0824e+08	1.66701e+08	9.27098e+07	1.90598e+08
	TG(33:6)+NH4	C36 H60 O6 N1	602.442	5.94171	0.000401197	2.73979e+08	4.37332e+08	3.6026e+08	1.19257e+08	4.55979e+08
	TG(33:6)+H	C36 H57 O6	585.415	9.95824	0.0353587	3.04973e+07	8.10381e+07	6.9553e+07	7.24187e+07	1.08849e+08
	TG(33:6e)+H	C36 H59 O5	571.436	7.38511	0.00504786	6.00247e+07	3.38627e+08	9.01143e+08	3.30933e+08	5.90932e+08
	TG(33:6e)+H	C36 H59 O5	571.436	9.30295	8.91855e-08	3.95265e+07	7.12865e+07	6.00838e+07	1.29224e+07	7.53899e+07
	TG(33:6e)+H	C36 H59 O5	571.436	10.1325	2.83322e-07	2.07959e+07	4.2096e+07	4.70119e+07	5.27519e+06	5.4858e+07
	TG(33:6p)+H	C36 H57 O5	569.42	9.73994	4.05852e-10	2.68947e+07	5.5654e+07	6.97593e+07	7.53685e+06	7.38055e+07
	TG(34:1)+NH4	C37 H72 O6 N1	626.535	7.667	0.0142124	8.687e+06	1.39806e+07	2.10341e+07	8.7861e+06	1.96813e+07
	TG(34:1)+NH4	C37 H72 O6 N1	626.535	8.60107	0.0204393	8.6581e+06	1.89204e+07	1.21807e+07	7.99205e+06	1.62071e+07
	TG(34:2p)+H	C37 H67 O5	591.498	10.5354	0.00506613	1.37673e+07	3.09381e+07	3.90428e+07	2.49637e+07	3.53046e+07
	TG(34:3p)+H	C37 H65 O5	589.483	9.65135	0.0156527	2.93946e+07	5.88695e+07	4.21965e+07	5.13776e+07	5.94028e+07
	TG(34:3p)+H	C37 H65 O5	589.483	10.029	0.0270962	8.71185e+07	1.99012e+08	1.93126e+08	1.33361e+08	2.50776e+08
	TG(34:4)+H	C37 H63 O6	603.462	5.94181	0.000589173	4.28752e+06	6.82969e+06	5.71882e+06	2.14906e+06	7.3508e+06
	TG(34:4p)+H	C37 H63 O5	587.467	8.91124	1.37883e-10	2.20086e+06	5.31146e+06	1.60414e+07	3.20712e+07	1.12651e+07
	TG(35:3)+NH4	C38 H70 O6 N1	636.52	5.54842	0.00274776	5.77927e+07	9.50249e+07	9.32919e+07	4.41638e+07	1.01563e+08
	TG(35:5)+NH4	C38 H66 O6 N1	632.488	4.22855	8.84077e-05	1.90764e+08	3.71375e+08	6.18287e+08	6.3453e+08	4.02103e+08
	TG(35:5)+NH4	C38 H66 O6 N1	632.488	5.02328	0.0468661	5.42656e+07	7.87857e+07	5.57497e+07	5.12829e+07	7.3383e+07
	TG(35:5)+NH4	C38 H66 O6 N1	632.488	6.50602	0.000594399	9.31384e+07	1.31084e+08	1.09693e+08	4.34055e+07	1.27262e+08
	TG(35:6)+NH4	C38 H64 O6 N1	630.473	5.933	0.00119838	1.97721e+08	2.55141e+08	3.78994e+08	1.25644e+08	2.48242e+08
	TG(36:5)+NH4	C39 H68 O6 N1	646.504	5.40043	0.0204587	8.40224e+07	1.87679e+08	2.85282e+08	1.85365e+08	2.32208e+08
	TG(37:4)+NH4	C40 H72 O6 N1	662.535	5.98856	0.00403649	4.49985e+06	8.23659e+06	1.01808e+07	5.11923e+06	5.40381e+06
	TG(38:1)+NH4	C41 H80 O6 N1	682.598	9.67294	0.0672343	7.08957e+06	1.18603e+07	7.43645e+06	5.19165e+06	8.78206e+06
	TG(48:0)+NH4	C51 H102 O6 N1	824.77	21.6264	0.336035	9.57236e+07	9.82262e+07	7.08299e+07	9.72789e+07	1.3859e+08
	TG(49:1)+NH4	C52 H102 O6 N1	836.77	21.1514	0.070229	3.39194e+06	8.43485e+06	9.2455e+06	8.95265e+06	6.8551e+06
	TG(50:0)+NH4	C53 H106 O6 N1	852.801	22.3835	0.712534	4.97534e+08	4.79481e+08	4.16955e+08	3.9926e+08	7.74742e+08
	TG(50:0)+Na	C53 H102 O6 Na1	857.757	22.3835	0.187242	4.95665e+07	4.49141e+07	3.36135e+07	3.11418e+07	6.59589e+07
	TG(50:0)+NH4	C53 H106 O6 N1	852.801	24.7721	0.0645021	2.03537e+08	5.51506e+07	4.25747e+07	5.73241e+07	5.67158e+07
	TG(50:0)+NH4	C53 H106 O6 N1	852.801	25.9818	0.664902	8.50483e+07	1.06189e+08	1.23484e+08	7.27908e+07	7.22049e+07
	TG(50:0)+NH4	C53 H106 O6 N1	852.801	27.017	0.233395	1.10469e+08	6.50412e+07	6.83492e+07	8.84163e+07	9.39007e+07
	TG(50:0)+NH4	C53 H106 O6 N1	852.801	27.8262	0.0757014	2.0941e+08	6.305e+07	7.25876e+07	6.73741e+07	6.92609e+07
	TG(50:0)+NH4	C53 H106 O6 N1	852.801	28.5759	0.217615	5.8198e+07	4.98377e+07	5.92055e+07	6.74107e+07	5.29523e+07
	TG(50:1)+NH4	C53 H104 O6 N1	850.786	21.6107	0.8867	5.02647e+08	5.1284e+08	5.15766e+08	5.1108e+08	4.93413e+08
	TG(50:1)+NH4	C53 H104 O6 N1	850.786	22.2465	0.76077	6.59227e+07	8.33102e+07	8.25863e+07	7.2703e+07	7.17284e+07
	TG(50:1)+NH4	C53 H104 O6 N1	850.786	22.8226	0.760433	1.33987e+08	1.12801e+08	1.39138e+08	1.15586e+08	8.75649e+07
	TG(50:1)+NH4	C53 H104 O6 N1	850.786	23.2517	0.0775517	8.53685e+07	1.01033e+08	1.72198e+08	1.27083e+08	9.68551e+07
	TG(50:1)+NH4	C53 H104 O6 N1	850.786	23.553	0.751038	9.85915e+07	8.93003e+07	1.00709e+08	9.29996e+07	9.68772e+07
	TG(50:1)+NH4	C53 H104 O6 N1	850.786	24.0843	0.131948	1.51065e+08	8.97611e+07	1.44373e+08	1.00381e+08	8.54502e+07
	TG(50:1)+NH4	C53 H104 O6 N1	850.786	24.408	0.261861	1.29269e+08	1.05329e+08	1.30878e+08	1.03912e+08	1.16114e+08
	TG(50:1)+NH4	C53 H104 O6 N1	850.786	24.905	0.326487	1.16148e+08	9.60867e+07	1.38234e+08	1.00268e+08	1.79273e+08
	TG(50:1)+NH4	C53 H104 O6 N1	850.786	25.2438	0.26079	1.59943e+08	1.28053e+08	2.21346e+08	1.85131e+08	1.57534e+08
	TG(50:1)+NH4	C53 H104 O6 N1	850.786	25.518	0.259987	2.38385e+08	1.80948e+08	1.41295e+08	2.13578e+08	1.77239e+08
	TG(50:1)+NH4	C53 H104 O6 N1	850.786	26.1598	0.794402	2.29656e+08	1.98231e+08	1.89195e+08	1.95828e+08	2.71573e+08
	TG(50:1)+NH4	C53 H104 O6 N1	850.786	26.9005	0.818353	1.96293e+08	1.61744e+08	1.79092e+08	2.03366e+08	1.70576e+08
	TG(50:1)+NH4	C53 H104 O6 N1	850.786	27.2777	0.486559	1.6822e+08	1.95426e+08	1.49496e+08	1.75255e+08	1.7368e+08
	TG(50:1)+NH4	C53 H104 O6 N1	850.786	27.4989	0.75482	2.38347e+08	2.54611e+08	2.02312e+08	1.75231e+08	1.87338e+08
	TG(50:1)+NH4	C53 H104 O6 N1	850.786	29.5072	0.462162	8.64928e+08	7.23501e+08	8.51593e+08	7.63847e+08	8.29743e+08
	TG(50:2)+NH4	C53 H102 O6 N1	848.77	22.4787	0.637843	7.89121e+06	8.66164e+06	8.014e+06	7.69169e+06	8.18323e+06
	TG(50:2)+NH4	C53 H102 O6 N1	848.77	22.9828	0.178925	1.4902e+07	1.0196e+07	1.17604e+07	8.88573e+06	1.3408e+07
	TG(50:2)+NH4	C53 H102 O6 N1	848.77	26.1114	0.169368	4.83201e+07	3.31818e+07	4.89183e+07	3.99107e+07	3.71041e+07
	TG(50:2)+NH4	C53 H102 O6 N1	848.77	27.4013	0.604994	3.9398e+07	3.80046e+07	3.49584e+07	2.83236e+07	2.90171e+07
	TG(50:2)+NH4	C53 H102 O6 N1	848.77	29.476	0.522489	8.36338e+07	1.19187e+08	1.15108e+08	1.24907e+08	1.08264e+08
	TG(51:0)+NH4	C54 H108 O6 N1	866.817	22.7092	0.950041	1.81512e+07	1.80369e+07	1.73546e+07	1.64598e+07	3.02251e+07
	TG(51:1)+NH4	C54 H106 O6 N1	864.801	22.0007	0.388179	4.49331e+07	6.36043e+07	4.55735e+07	4.74564e+07	4.36541e+07
	TG(51:1)+NH4	C54 H106 O6 N1	864.801	24.3484	0.051397	1.93443e+07	1.71038e+07	3.46027e+07	2.23336e+07	7.16675e+06
	TG(51:1)+NH4	C54 H106 O6 N1	864.801	24.9024	0.15974	1.35311e+07	8.60496e+06	1.12292e+07	1.0536e+07	1.26456e+07
	TG(51:1)+NH4	C54 H106 O6 N1	864.801	25.4186	0.658806	1.4154e+07	1.67954e+07	1.48831e+07	1.66639e+07	1.63362e+07
	TG(51:1)+NH4	C54 H106 O6 N1	864.801	26.4396	0.305793	1.59532e+07	2.31667e+07	1.64508e+07	1.80331e+07	1.63689e+07
	TG(51:1)+NH4	C54 H106 O6 N1	864.801	26.8686	0.7946	1.69365e+07	1.62999e+07	1.85783e+07	1.71248e+07	1.95144e+07
	TG(51:1)+NH4	C54 H106 O6 N1	864.801	27.2459	0.684057	1.73557e+07	1.9417e+07	2.35587e+07	1.85113e+07	1.61804e+07
	TG(51:1)+NH4	C54 H106 O6 N1	864.801	27.9366	0.164524	1.23047e+07	1.40715e+07	1.71097e+07	9.66364e+06	1.52041e+07
	TG(51:1)+NH4	C54 H106 O6 N1	864.801	28.4139	0.616328	1.14659e+07	1.34703e+07	1.28548e+07	1.59147e+07	1.22555e+07
	TG(51:2)+NH4	C54 H104 O6 N1	862.786	21.2676	0.176357	1.2205e+07	1.60641e+07	1.55019e+07	1.87989e+07	1.46764e+07
	TG(52:0)+NH4	C55 H110 O6 N1	880.833	22.9932	0.507784	9.01512e+08	8.81225e+08	8.2256e+08	6.51604e+08	1.34513e+09
	TG(52:0)+NH4	C55 H110 O6 N1	880.833	27.117	0.206989	8.7129e+08	4.73347e+08	4.75546e+08	4.83684e+08	4.88235e+08
	TG(52:1)+H	C55 H105 O6	861.791	22.3566	0.962082	6.6618e+06	6.5192e+06	6.45413e+06	6.3871e+06	5.83075e+06
	TG(52:1)+NH4	C55 H108 O6 N1	878.817	22.3566	0.772183	5.88466e+09	5.89482e+09	5.78233e+09	5.79474e+09	5.6192e+09
	TG(52:1)+NH4	C55 H108 O6 N1	878.817	23.1856	0.61553	1.22855e+09	1.09097e+09	1.22511e+09	1.23777e+09	1.23904e+09
	TG(52:1)+NH4	C55 H108 O6 N1	878.817	24.32	0.738362	1.90474e+09	1.79547e+09	1.7631e+09	1.50212e+09	2535891224
	TG(52:1)+NH4	C55 H108 O6 N1	878.817	25.021	0.79015	1.77141e+09	2236386469	2344399078	2.05184e+09	2.12897e+09
	TG(52:1)+NH4	C55 H108 O6 N1	878.817	25.3801	0.48084	2.32993e+09	1.96778e+09	2.03942e+09	2.43958e+09	2.11616e+09
	TG(52:1)+NH4	C55 H108 O6 N1	878.817	26.22	0.548527	4.70353e+09	3464966084	4.40655e+09	7.27618e+09	2.54595e+09
	TG(52:1)+NH4	C55 H108 O6 N1	878.817	27.1304	0.186526	3.62063e+09	2.31999e+09	2.48578e+09	3140937547	2.44866e+09
	TG(52:1)+NH4	C55 H108 O6 N1	878.817	28.5686	0.448028	2325150226	2.72712e+09	2527827938	2.95216e+09	2.11278e+09
	TG(52:2)+NH4	C55 H106 O6 N1	876.801	20.7809	0.251448	1.12886e+08	1.23402e+08	1.17625e+08	1.26908e+08	1.17268e+08
	TG(52:2)+NH4	C55 H106 O6 N1	876.801	21.7073	0.733398	1.7354e+09	1.73345e+09	1.7808e+09	1.71636e+09	1.4932e+09
	TG(52:2)+NH4	C55 H106 O6 N1	876.801	22.2807	0.954411	2.12321e+08	2.34136e+08	2.17807e+08	2.4182e+08	1.95526e+08
	TG(52:2)+NH4	C55 H106 O6 N1	876.801	22.7954	0.958702	3.1944e+08	2.94741e+08	3.53847e+08	2.98883e+08	2.12081e+08
	TG(52:2)+NH4	C55 H106 O6 N1	876.801	23.3067	0.296786	5.62665e+08	4.50905e+08	6.43018e+08	5.39007e+08	5.52822e+08
	TG(52:2)+NH4	C55 H106 O6 N1	876.801	24.026	0.0543393	4.09661e+08	3.39847e+08	5.21923e+08	3.51087e+08	3.69507e+08
	TG(52:2)+NH4	C55 H106 O6 N1	876.801	25.576	0.800219	7.47825e+08	7.15859e+08	9.75854e+08	6.82703e+08	7.05924e+08
	TG(52:2)+NH4	C55 H106 O6 N1	876.801	28.7524	0.559214	7.45826e+08	6.56255e+08	8.21797e+08	5.78786e+08	5.54386e+08
	TG(53:1)+NH4	C56 H110 O6 N1	892.833	22.0027	0.451466	2.78853e+07	3.05765e+07	2.70106e+07	2.76461e+07	2.8838e+07
	TG(53:1)+NH4	C56 H110 O6 N1	892.833	22.6722	0.0741391	4.321e+07	4.25172e+07	4.24492e+07	4.0644e+07	4.22958e+07
	TG(53:2)+NH4	C56 H108 O6 N1	890.817	22.0835	0.582382	1.35507e+07	1.4319e+07	1.45476e+07	1.45334e+07	1.30298e+07
	TG(54:0)+NH4	C57 H114 O6 N1	908.864	23.5056	0.760741	1.80871e+08	163547033	1.63218e+08	1.60913e+08	2.28777e+08
	TG(54:1)+NH4	C57 H112 O6 N1	906.848	22.3403	0.575811	1447878551	1.37302e+09	1.4544e+09	1.35975e+09	1.27207e+09
	TG(54:1)+NH4	C57 H112 O6 N1	906.848	22.961	0.155387	6.78025e+08	6.5186e+08	6.412e+08	6.33447e+08	6.58513e+08
	TG(54:2)+NH4	C57 H110 O6 N1	904.833	21.6963	0.421958	8.26814e+08	7.69382e+08	7.92584e+08	7.55945e+08	6.54144e+08
	TG(54:2)+NH4	C57 H110 O6 N1	904.833	22.399	0.632599	2.34185e+08	2.12932e+08	2.16599e+08	2.22171e+08	2.08713e+08
	TG(54:3)+NH4	C57 H108 O6 N1	902.817	20.9676	0.13342	5.264e+07	4.9897e+07	5.40739e+07	6.13618e+07	4.35637e+07
	TG(54:4)+NH4	C57 H106 O6 N1	900.801	21.5057	0.324928	1.13925e+07	1.15322e+07	1.20663e+07	1.11678e+07	9.648e+06
	TG(55:2)+NH4	C58 H112 O6 N1	918.848	21.687	0.0661293	1.59102e+07	1.69237e+07	1.6073e+07	1.46404e+07	1.34643e+07
	TG(56:1)+NH4	C59 H116 O6 N1	934.88	23.4672	0.624974	5.30105e+07	5.33363e+07	5.13131e+07	5.07004e+07	5.85903e+07
	TG(56:1)+NH4	C59 H116 O6 N1	934.88	23.9861	0.758625	3.47182e+07	4.14017e+07	4.39484e+07	3.61077e+07	2.96467e+07
	TG(56:1)+NH4	C59 H116 O6 N1	934.88	24.4752	0.160005	3.37593e+07	3.70851e+07	8.18539e+07	3.3117e+07	4.02679e+07
	TG(56:1)+NH4	C59 H116 O6 N1	934.88	25.0712	0.230754	3.93283e+07	3.08328e+07	3.50696e+07	3.55798e+07	3.10474e+07
	TG(56:1)+NH4	C59 H116 O6 N1	934.88	25.5173	0.689265	4.82392e+07	5.29339e+07	5.78103e+07	4.94842e+07	4.94194e+07
	TG(56:1)+NH4	C59 H116 O6 N1	934.88	26.2102	0.168271	5.03173e+07	9.36416e+07	9.95583e+07	5.49892e+07	4.77132e+07
	TG(56:1)+NH4	C59 H116 O6 N1	934.88	27.0076	0.794818	9.11317e+07	1.08578e+08	8.06233e+07	8.95383e+07	9.45332e+07
	TG(56:1)+NH4	C59 H116 O6 N1	934.88	27.9775	0.777938	7.58804e+07	6.52897e+07	8.29469e+07	7.54433e+07	5.64875e+07
	TG(56:2)+NH4	C59 H114 O6 N1	932.864	21.665	0.807978	3.2303e+07	3.34358e+07	3.53537e+07	3.21262e+07	2.82446e+07
	TG(56:5)+NH4	C59 H108 O6 N1	926.817	21.3857	0.393726	6.32298e+06	6.44761e+06	6.73955e+06	6.27482e+06	5.29728e+06
	TG(58:4)+NH4	C61 H114 O6 N1	956.864	21.995	0.209726	7.85224e+06	7.34804e+06	7.66297e+06	8.08312e+06	6.20788e+06
	TG(32:3e)+Na	C35 H62 O5 Na1	585.449	5.92638	0.078661	2.14726e+07	5.20799e+07	6.59263e+07	6.28189e+07	6.80103e+07
	TG(33:5p)+H	C36 H59 O5	571.436	4.949	0.344571	1.50219e+08	3.11917e+08	2.77355e+08	2.85112e+08	3.38656e+08
	TG(33:6)+H	C36 H57 O6	585.415	10.7736	0.262079	2.49158e+07	4.15717e+07	3.19435e+07	3.22246e+07	4.69452e+07
	TG(34:2)+NH4	C37 H70 O6 N1	624.52	6.565	0.0516142	6.93307e+06	1.2221e+07	1.68653e+07	9.50391e+06	1.48526e+07
	TG(34:5)+NH4	C37 H64 O6 N1	618.473	5.38932	0.174714	1.06953e+07	3.00282e+07	5.11225e+07	8.29242e+07	5.04222e+07
	TG(35:4)+NH4	C38 H68 O6 N1	634.504	4.96749	0.238978	1.7632e+08	3.53065e+08	5.52907e+08	4.81988e+08	4.1466e+08
	TG(36:2)+NH4	C39 H74 O6 N1	652.551	8.11484	0.0813682	8.07799e+07	1.60911e+08	1.08482e+08	9.76095e+07	1.38504e+08
	TG(36:3)+NH4	C39 H72 O6 N1	650.535	6.44995	0.239054	8.17921e+06	1.71629e+07	2.07873e+07	1.81519e+07	1.99386e+07
	TG(36:4)+NH4	C39 H70 O6 N1	648.52	5.91709	0.104686	2.7562e+07	4.47097e+07	1.10679e+08	1.25104e+08	5.78368e+07
Glycerophospholipids
PA	PA(46:1)-H	C49 H94 O8 N0 P1	841.669	14.4343	6.40634e-05	3.46232e+06	4.01703e+06	5.6102e+06	1.6009e+06	2.3084e+06
	PA(28:1)-H	C31 H58 O8 N0 P1	589.387	6.63337	0.712512	7.01089e+06	6.61241e+06	8.29428e+06	8.73419e+06	2.65728e+06
PC	PC(19:2e)+H	C27 H53 O7 N1 P1	534.355	2.91408	7.00134e-10	4.16064e+06	5.79756e+06	2.76099e+07	8.48521e+07	1.91062e+07
	PC(32:0)+H	C40 H81 O8 N1 P1	734.569	10.7121	0.00226112	2.77776e+06	1.81557e+06	1.71494e+06	6.70452e+06	4.58656e+06
	PC(32:1)+H	C40 H79 O8 N1 P1	732.554	9.80888	9.53212e-07	1.93982e+07	9.53918e+06	1.03268e+07	8.65857e+07	3.73436e+07
	PC(33:1)+H	C41 H81 O8 N1 P1	746.569	10.0378	5.45383e-07	4.22653e+07	8.74304e+07	1.96725e+08	2.7165e+07	1.66591e+08
	PC(33:2)+H	C41 H79 O8 N1 P1	744.554	9.34098	3.15272e-05	5.10879e+07	8.33759e+07	2.21655e+08	2.57056e+07	1.63939e+08
	PC(34:1)+H	C42 H83 O8 N1 P1	760.585	10.7391	2.13746e-06	1.49633e+08	8.85113e+07	5.81236e+07	3.11934e+08	2.13909e+08
	PC(34:2)+H	C42 H81 O8 N1 P1	758.569	9.85047	3.25932e-08	3.5472e+08	2.24669e+08	1.21721e+08	1.23468e+09	5.89111e+08
	PC(35:1)+H	C43 H85 O8 N1 P1	774.601	11.4892	1.25954e-16	1.91347e+08	1.5016e+08	7.84983e+08	5.50529e+09	2.12407e+09
	PC(35:2)+H	C43 H83 O8 N1 P1	772.585	10.0403	2.19882e-16	2.62565e+07	3.64435e+07	9.26761e+07	1.43506e+09	3.58127e+08
	PC(36:1)+H	C44 H87 O8 N1 P1	788.616	11.7058	9.33191e-08	2.6916e+07	1.72212e+07	1.08505e+07	5.57346e+07	3.7523e+07
	PC(36:2)+Na	C44 H84 O8 N1 P1 Na1	808.583	10.7608	1.40183e-07	1.95865e+08	1.14992e+08	4.77038e+07	2.04312e+08	1.37264e+08
	PC(36:2)+H	C44 H85 O8 N1 P1	786.601	10.7608	1.37057e-09	2.24019e+09	1.51811e+09	6.2283e+08	4.79515e+09	2.99842e+09
	PC(36:3)+H	C44 H83 O8 N1 P1	784.585	10.1339	2.31401e-08	8.44377e+07	4.67299e+07	3.92395e+07	3.05895e+08	1.50005e+08
	PC(36:3)+Na	C44 H82 O8 N1 P1 Na1	806.567	10.1339	2.69267e-09	1.06574e+07	5.9536e+06	3.02701e+06	4.14717e+07	1.39679e+07
	PC(36:3)+H	C44 H83 O8 N1 P1	784.585	10.4694	8.28285e-15	6.4193e+06	6.16595e+06	8.62454e+06	7.62806e+07	3.68529e+07
	PC(36:4)+H	C44 H81 O8 N1 P1	782.569	9.29739	5.11888e-14	8.26087e+06	5.47169e+06	8.89631e+06	1.4822e+08	3.85298e+07
	PC(37:1)+H	C45 H89 O8 N1 P1	802.632	12.1659	4.30915e-05	1.4694e+06	2.92951e+06	3.39933e+06	7.10388e+06	2.74672e+06
	PC(37:2)+H	C45 H87 O8 N1 P1	800.616	11.3486	6.4093e-06	1.07893e+08	4.91045e+07	4.23873e+07	1.45341e+08	1.23889e+08
	PC(38:2)+H	C46 H89 O8 N1 P1	814.632	11.657	4.21397e-05	3.41252e+07	2.08409e+07	1.51418e+07	5.3637e+07	4.54998e+07
	PC(38:2)+H	C46 H89 O8 N1 P1	814.632	11.922	0.0207906	2.2514e+07	1.92623e+07	2.47824e+07	3.93941e+07	3.76106e+07
	PC(34:2)+HCOO	C43 H81 O10 N1 P1	802.56	9.86152	0.00252553	1.61135e+08	8.02521e+07	6.61725e+07	3.11967e+08	7.92597e+07
	PC(35:1)+HCOO	C44 H85 O10 N1 P1	818.592	11.2116	0.00499074	5.898e+06	2.78186e+06	3.04372e+06	1.52002e+07	2.94562e+06
	PC(35:2)+HCOO	C44 H83 O10 N1 P1	816.576	10.3199	0.000389351	2.4263e+07	8.00168e+06	1.13343e+07	8.95386e+07	1.46979e+07
	PC(36:1)+HCOO	C45 H87 O10 N1 P1	832.607	11.7122	0.00623878	2.14652e+07	1.09209e+07	9.31901e+06	4.18651e+07	1.08759e+07
	PC(36:2)+HCOO	C45 H85 O10 N1 P1	830.592	10.7752	0.00085728	8.43164e+08	4.55118e+08	3.22866e+08	1.26069e+09	4.01997e+08
	PC(36:3)+HCOO	C45 H83 O10 N1 P1	828.576	10.2064	9.59658e-06	3.83839e+07	1.79791e+07	1.7531e+07	1.3757e+08	2.466e+07
	PC(36:4)+HCOO	C45 H81 O10 N1 P1	826.56	9.32104	6.7131e-07	4.81594e+06	2.22641e+06	4.08666e+06	2.29654e+07	5.42549e+06
	PC(38:2)+HCOO	C47 H89 O10 N1 P1	858.623	11.6565	0.010955	2.14036e+07	9.85927e+06	1.0619e+07	3.81482e+07	8.67958e+06
	PC(38:3)+HCOO	C47 H87 O10 N1 P1	856.607	11.1311	0.00042541	7.38302e+06	2.69582e+06	2.93416e+06	1.78948e+07	4.0885e+06
PE	PE(32:1)+H	C37 H73 O8 N1 P1	690.507	10.1222	0.00111548	1.18606e+07	1.03582e+07	6.82001e+06	1.22245e+07	1.204e+07
	PE(34:1)+H	C39 H77 O8 N1 P1	718.538	11.0302	0.000293542	3.3097e+07	2.06828e+07	1.61726e+07	3.4056e+07	3.26864e+07
	PE(34:2)+Na	C39 H74 O8 N1 P1 Na1	738.504	10.1485	2.10119e-05	2.79939e+07	1.77061e+07	1.06877e+07	2.65491e+07	2.34394e+07
	PE(34:2)+H	C39 H75 O8 N1 P1	716.522	10.1485	5.25765e-06	1.49332e+08	1.01599e+08	6.42453e+07	1.77178e+08	1.67751e+08
	PE(35:2)+H	C40 H77 O8 N1 P1	730.538	10.6029	2.80206e-07	6.62859e+06	3.97511e+06	4.53704e+06	1.84979e+07	1.26198e+07
	PE(36:1)+H	C41 H81 O8 N1 P1	746.569	12.0269	0.000114745	7.41662e+06	4.92722e+06	3.57303e+06	1.02118e+07	9.57506e+06
	PE(36:2)+H	C41 H79 O8 N1 P1	744.554	11.054	5.45693e-06	3.38959e+08	2.30573e+08	1.62442e+08	4.04381e+08	3.66192e+08
	PE(36:3)+Na	C41 H76 O8 N1 P1 Na1	764.52	10.5056	5.6261e-08	2.26797e+06	1.00528e+06	992465	4.39192e+06	2.59838e+06
	PE(36:3)+H	C41 H77 O8 N1 P1	742.538	10.5056	1.4955e-07	1.09144e+07	5.19105e+06	5.96752e+06	2.99713e+07	1.73334e+07
	PE(37:2)+Na	C42 H80 O8 N1 P1 Na1	780.551	9.857	0.000391148	2.93435e+07	1.66851e+07	8.31285e+06	4.40928e+07	3.14091e+07
	PE(37:2)+H	C42 H81 O8 N1 P1	758.569	11.7297	0.00484405	1.03641e+07	5.5898e+06	6.97653e+06	1.26489e+07	1.23015e+07
	PE(43:2)+H	C48 H93 O8 N1 P1	842.663	11.9239	2.59652e-05	1.33914e+07	9.96292e+06	1.33182e+07	2.6617e+07	1.59656e+07
	PE(44:2p)+H	C49 H95 O7 N1 P1	840.684	15.905	0.000451564	5.68435e+06	9.8816e+06	1.27224e+07	1.40175e+07	1.224e+07
	PE(35:2)-H	C40 H75 O8 N1 P1	728.524	10.6187	0.01632	3.04869e+07	1.31668e+07	2.02254e+07	5.70605e+07	1.35508e+07
	PE(36:3)-H	C41 H75 O8 N1 P1	740.524	10.3419	0.000417827	4.01651e+07	1.62408e+07	2.52835e+07	8.32696e+07	1.80348e+07
	PE(37:2)-H	C42 H79 O8 N1 P1	756.555	11.0217	0.0127779	4.32383e+07	1.81617e+07	2.31925e+07	6.72387e+07	1.62587e+07
	PE(38:2)-H	C43 H81 O8 N1 P1	770.571	11.9844	0.0288758	1.15667e+07	4.60231e+06	7.83925e+06	1.39668e+07	3.2493e+06
	PE(40:6)-H	C45 H77 O8 N1 P1	790.539	7.572	1.10772e-06	2.97017e+06	4.71746e+06	1.58471e+07	15846571	3.38894e+06
	PE(32:1)-H	C37 H71 O8 N1 P1	688.492	10.1328	0.0836631	2.84585e+07	1.18922e+07	1.50968e+07	3.42234e+07	1.05253e+07
	PE(33:1)-H	C38 H73 O8 N1 P1	702.508	10.5966	0.0881508	6.49803e+06	2.71237e+06	4.40607e+06	1.30543e+07	2.80179e+06
	PE(34:1)-H	C39 H75 O8 N1 P1	716.524	8.13922	0.108279	3.79253e+07	5.49736e+07	8.239e+07	7.11165e+07	2.31825e+07
	PE(34:1)-H	C39 H75 O8 N1 P1	716.524	11.0363	0.143096	8.43034e+07	4.32576e+07	5.50647e+07	1.18809e+08	3.33066e+07
	PE(34:2)-H	C39 H73 O8 N1 P1	714.508	10.1616	0.087525	4.43617e+08	2.15068e+08	2.14336e+08	5.08253e+08	1.62227e+08
	PE(34:2)-H	C39 H73 O8 N1 P1	714.508	10.453	0.0543693	2.48298e+07	1.15489e+07	1.07894e+07	2.1699e+07	1.08871e+07
	PE(36:1)-H	C41 H79 O8 N1 P1	744.555	12.0274	0.0825158	2.3848e+07	1.15492e+07	1.35811e+07	3.63858e+07	8.10546e+06
	PE(36:2)-H	C41 H77 O8 N1 P1	742.539	11.0637	0.0604261	8.81081e+08	4.72812e+08	4.95181e+08	1.29776e+09	3.53395e+08
	PE(36:4)-H	C41 H73 O8 N1 P1	738.508	9.62793	0.116178	1.74717e+07	8.04647e+06	1.26451e+07	2.69516e+07	7.8257e+06
	PE(37:2)-H	C42 H79 O8 N1 P1	756.555	11.7332	0.203144	3.59209e+07	1.41126e+07	2.52705e+07	3.52284e+07	1.2473e+07
PG	PG(37:2)-H	C43 H80 O10 N0 P1	787.549	10.4107	0.0013432	5.4557e+07	2.16719e+07	2.53997e+07	9.27761e+07	2.09523e+07
	PG(38:3)-H	C44 H80 O10 N0 P1	799.549	10.018	1.10367e-10	1.90379e+07	1.56305e+07	7.46152e+07	9.10621e+08	1.50883e+08
	PG(38:5)-H	C44 H76 O10 N0 P1	795.518	9.07369	0.000251107	6.62774e+07	8.99123e+07	1.28787e+08	2.3747e+07	4.03784e+07
	PG(32:0)+Na	C38 H75 O10 N0 P1 Na1	745.499	8.42077	7.65131e-16	1.14112e+06	1.2627e+06	2.23482e+06	7.05767e+07	1.71859e+07
	PG(34:1)+Na	C40 H77 O10 N0 P1 Na1	771.515	9.94927	8.01812e-08	1.48912e+07	1.01772e+07	1.74505e+07	6.47926e+07	3.10348e+07
	PG(34:1)+NH4	C40 H81 O10 N1 P1	766.559	9.94927	1.02843e-11	1.77651e+07	1.55568e+07	3.73086e+07	2.78757e+08	1.09722e+08
	PG(34:2)+H	C40 H76 O10 N0 P1	747.517	9.02834	2.88324e-10	3.77043e+06	2.80354e+06	2.77346e+06	6.03447e+07	1.82019e+07
	PG(34:2)+NH4	C40 H79 O10 N1 P1	764.544	9.02834	8.06308e-12	8.47757e+06	9.0314e+06	9.94369e+06	1.59815e+08	5.36967e+07
	PG(36:2)+NH4	C42 H83 O10 N1 P1	792.575	9.94499	1.11697e-07	7.28896e+07	4.80061e+07	2.35363e+07	7.63252e+07	7.40155e+07
	PG(36:2)+Na	C42 H79 O10 N0 P1 Na1	797.53	9.94499	1.74762e-06	4.31951e+07	2.4429e+07	1.27064e+07	1.60102e+07	2.10898e+07
	PG(41:2)+H	C47 H90 O10 N0 P1	845.627	11.9276	8.62189e-10	5.37126e+07	5.82573e+07	4.44121e+07	4.13112e+06	4.61077e+07
	PG(32:0)-H	C38 H74 O10 N0 P1	721.503	9.88359	0.000817626	1.276e+07	7.44203e+06	1.64448e+07	6.55936e+07	1.07604e+07
	PG(32:1)-H	C38 H72 O10 N0 P1	719.487	8.96991	0.000177935	2.27539e+07	1.16525e+07	2.70539e+07	1.5505e+08	1.96245e+07
	PG(33:1)-H	C39 H74 O10 N0 P1	733.503	9.44888	8.54019e-06	6.45309e+06	3.13468e+06	8.03372e+06	3.91587e+07	7.90185e+06
	PG(34:0)-H	C40 H78 O10 N0 P1	749.534	10.8275	5.66863e-07	2.8895e+07	2.48797e+07	5.932e+07	5.74799e+08	6.41294e+07
	PG(34:1)-H	C40 H76 O10 N0 P1	747.518	9.95887	2.77658e-06	3.29201e+08	2.25135e+08	5.99634e+08	3.03029e+09	5.14834e+08
	PG(34:2)-H	C40 H74 O10 N0 P1	745.503	9.0504	0.00124283	2.94404e+08	2.05241e+08	3.20517e+08	1.84479e+09	2.69258e+08
	PG(34:3)-H	C40 H72 O10 N0 P1	743.487	8.41868	1.16225e-08	6.52184e+07	5.2174e+07	1.21069e+08	1.804e+09	2.11981e+08
	PG(35:1)-H	C41 H78 O10 N0 P1	761.534	10.6105	0.00174891	1.56013e+07	7.49712e+06	1.30617e+07	6.32871e+07	8.50307e+06
	PG(36:2)-H	C42 H78 O10 N0 P1	773.534	9.97019	0.0395774	1.06687e+09	7.74327e+08	1.22152e+09	6.56663e+08	4.92734e+08
	PG(36:4)-H	C42 H74 O10 N0 P1	769.503	8.51458	0.00050943	1.44993e+07	8.3049e+06	1.06781e+07	5.63475e+07	1.01091e+07
	PG(25:0e)-H	C31 H62 O9 N0 P1	609.414	4.438	0.173279	3.14395e+08	3.26334e+08	3.98858e+08	2.72687e+08	3.46109e+08
	PG(32:0)-H	C38 H74 O10 N0 P1	721.503	9.10437	0.220544	1.23947e+07	1.64853e+07	2.94102e+07	1.33075e+07	6.15718e+06
	PG(34:4)-H	C40 H70 O10 N0 P1	741.471	7.43331	0.068637	1.31041e+07	2.32961e+07	1.36039e+07	7.24376e+07	7.43568e+06
	PG(35:1)-H	C41 H78 O10 N0 P1	761.534	10.3564	0.101818	4.06318e+07	1.94492e+07	2.84782e+07	8.27475e+07	1.49569e+07
PI	PI(29:1)-H	C38 H70 O13 N0 P1	765.456	3.658	0.000395101	2.63513e+07	2.49524e+07	1.44368e+07	1.33255e+07	1.55297e+07
	PI(54:1)-H	C63 H120 O13 N0 P1	1115.85	12.6586	0.000132237	9.05582e+07	1.46587e+08	3.37759e+08	4.37465e+07	9.12692e+07
	PI(38:4)+H	C47 H84 O13 N0 P1	887.564	11.4695	0.000901941	2.33654e+07	3.73459e+07	2.89288e+07	5.67666e+07	3.94573e+07
	PI(40:5)+NH4	C49 H89 O13 N1 P1	930.607	8.28024	1.40146e-17	5.14423e+07	5.48957e+07	3.60825e+08	6.74945e+09	1.91022e+09
	PI(42:4)+NH4	C51 H95 O13 N1 P1	960.654	9.076	1.31177e-17	4.11704e+06	3.99184e+06	2.22285e+07	2.77715e+08	7.80444e+07
	PI(54:1)+H	C63 H122 O13 N0 P1	1117.86	14.2028	1.42871e-09	2.18711e+08	2.37631e+08	1.535e+08	9.89537e+06	2.16883e+08
	PI(54:1)+H	C63 H122 O13 N0 P1	1117.86	14.464	1.50234e-09	6.19059e+07	6.12372e+07	5.87979e+07	1.13325e+07	7.00895e+07
	PI(54:2)+H	C63 H120 O13 N0 P1	1115.85	13.2227	4.13498e-08	584553881	6.71583e+08	4.57793e+08	2.06124e+07	6.48843e+08
	PI(38:4)-H	C47 H82 O13 N0 P1	885.55	11.1683	0.816871	1.54062e+07	1.69172e+07	2.10714e+07	3.48688e+07	1.70801e+06
	PI(40:4)-H	C49 H86 O13 N0 P1	913.581	7.03256	0.545845	7.28866e+07	6.34581e+07	4.58393e+07	6.25389e+07	3.2533e+07
PS	PS(36:3)-H	C42 H75 O10 N1 P1	784.513	11.014	0.0286004	9.0698e+06	5.11912e+06	4.76825e+06	1.05271e+07	5.27491e+06
	PS(36:4)-H	C42 H73 O10 N1 P1	782.498	10.1603	0.00112172	4.91573e+07	2.4531e+07	1.69976e+07	3.87407e+07	2.45725e+07
	PS(37:0)-H	C43 H83 O10 N1 P1	804.576	10.742	0.0119834	7.11483e+07	3.46944e+07	3.55934e+07	9.94834e+07	3.84323e+07
	PS(38:4)-H	C44 H77 O10 N1 P1	810.529	11.0711	0.00622572	9.60035e+07	5.93503e+07	4.77474e+07	1.12778e+08	5.75662e+07
	PS(40:1)-H	C46 H87 O10 N1 P1	844.607	11.2605	0.00098531	5.68671e+07	2.2351e+07	2.50829e+07	1.13701e+08	2.42943e+07
	PS(43:1)+Na	C49 H94 O10 N1 P1 Na1	910.651	9.63172	0.000202344	4.80398e+07	8.34835e+07	7.93192e+07	1.33706e+07	8.6849e+07
	PS(45:4)+Na	C51 H92 O10 N1 P1 Na1	932.635	9.26608	4.43859e-17	2.19955e+07	2.32762e+07	1.31146e+08	1.91704e+09	5.25277e+08
	PS(47:2)+Na	C53 H100 O10 N1 P1 Na1	964.698	11.685	3.67378e-09	4.63641e+06	2.90178e+06	8.94517e+06	2.78458e+07	1.25025e+07
	PS(48:2)+Na	C54 H102 O10 N1 P1 Na1	978.713	12.081	0.0162433	1.92393e+06	1.596e+06	2.70887e+06	4.38521e+06	3.59237e+06
	PS(39:4)-H	C45 H79 O10 N1 P1	824.545	11.7424	0.0886506	6.24068e+06	2.40257e+06	3.29089e+06	4.91483e+06	2.25131e+06
LPC	LPC(16:0)+HCOO	C25 H51 O9 N1 P1	540.331	2.83218	0.00721518	1.28897e+07	8.94072e+06	5.50482e+07	5.82333e+07	1.46345e+07
	LPC(16:0)+HCOO	C25 H51 O9 N1 P1	540.331	3.125	6.73588e-06	3.02904e+06	2.34477e+06	7.2636e+07	4.6693e+07	1.55599e+07
	LPC(18:0)+H	C26 H55 O7 N1 P1	524.371	3.92566	0.0458206	1.83284e+06	4.78673e+06	8.67679e+06	1.13524e+07	8.6642e+06
	LPC(18:1)+HCOO	C27 H53 O9 N1 P1	566.346	2.9399	0.0121134	2.65044e+08	2.45589e+08	1448814317	1.54305e+09	4.39157e+08
	LPC(18:2)+H	C26 H51 O7 N1 P1	520.34	2.5007	0.00480636	1.72025e+07	1.56505e+07	1.15824e+08	3.14622e+08	1.31306e+08
	LPC(18:2)+HCOO	C27 H51 O9 N1 P1	564.331	2.53209	0.00560562	1.80768e+07	9.02323e+06	7.67041e+07	7.49974e+07	2.20671e+07
	LPC(16:0)+H	C24 H51 O7 N1 P1	496.34	2.82504	0.125348	1.16361e+07	1.30278e+07	5.65991e+07	9.35215e+07	6.51948e+07
	LPC(16:1)+Na	C24 H48 O7 N1 P1 Na1	516.306	2.28643	0.251931	8.61795e+06	7.07404e+06	2.0009e+07	3.52659e+07	2.08187e+07
	LPC(16:1)+H	C24 H49 O7 N1 P1	494.324	2.28643	0.236723	1.26944e+08	1.13783e+08	4.10839e+08	9.63768e+08	4.90287e+08
	LPC(16:1)+HCOO	C25 H49 O9 N1 P1	538.315	2.26292	0.0799046	6.56722e+07	3.90936e+07	1.56976e+08	2.25035e+08	4.78301e+07
	LPC(18:1)+H	C26 H53 O7 N1 P1	522.355	2.93003	0.0672277	2.69774e+08	3.50133e+08	1.49243e+09	2.57326e+09	1.52591e+09
	LPC(20:4)+H	C28 H51 O7 N1 P1	544.34	2.95795	0.0750973	2.11985e+07	2.13794e+07	1.08816e+08	1.79551e+08	1.02912e+08
LPE	LPE(18:1)+Na	C23 H46 O7 N1 P1 Na1	502.29	3.09096	0.0465653	6.05664e+06	8.42851e+06	2.18136e+07	3.20092e+07	1.95514e+07
	LPE(17:1)-H	C22 H43 O7 N1 P1	464.278	2.686	0.0171472	1.03658e+07	6.50021e+06	2.92945e+07	4.68861e+07	9.38882e+06
	LPE(18:1)-H	C23 H45 O7 N1 P1	478.294	3.09494	0.0265157	2.20903e+08	1.79761e+08	8.25645e+08	7.13954e+08	2.30791e+08
	LPE(18:2)-H	C23 H43 O7 N1 P1	476.278	2.64953	2.12623e-08	1.10136e+07	7.29522e+06	4.19544e+07	5.0256e+07	1.08709e+07
	LPE(16:0)-H	C21 H43 O7 N1 P1	452.278	2.98128	0.0629878	1.45299e+07	1.11776e+07	4.40178e+07	4.38015e+07	1.12149e+07
	LPE(16:1)-H	C21 H41 O7 N1 P1	450.263	2.38701	0.191597	1.59414e+08	1.00706e+08	1.77208e+08	2.614e+08	8.43065e+07
	LPE(16:1)+H	C21 H43 O7 N1 P1	452.277	2.37272	0.178397	3.41282e+07	3.33274e+07	6.2214e+07	1.09147e+08	8.56658e+07
	LPE(18:1)+H	C23 H47 O7 N1 P1	480.308	3.09096	0.10769	4.23679e+07	5.88274e+07	1.54867e+08	1.82682e+08	1.61839e+08
LPG	LPG(16:0)+H	C22 H46 O9 N0 P1	485.287	2.46488	0.0013758	3.90839e+06	5.57534e+06	7.53238e+07	1.15877e+08	8.22045e+07
	LPG(18:1)+H	C24 H48 O9 N0 P1	511.303	2.55192	0.00448851	6.88958e+06	7.65933e+06	3.97518e+07	6.46086e+07	3.77966e+07
	LPG(16:0)-H	C22 H44 O9 N0 P1	483.273	2.46646	0.000690491	1.73998e+08	2.19318e+08	3.36735e+09	4.22192e+09	1.13409e+09
	LPG(16:1)-H	C22 H42 O9 N0 P1	481.257	2.04245	0.0335073	4.34471e+07	3.06255e+07	1.91064e+08	2.24277e+08	5.58664e+07
	LPG(18:0)-H	C24 H48 O9 N0 P1	511.304	3.3058	0.00977502	1.04956e+07	1.95407e+07	8.7258e+07	5.1814e+07	1.41671e+07
	LPG(18:1)-H	C24 H46 O9 N0 P1	509.288	2.5669	0.00357821	1.43838e+08	1.32204e+08	1.25245e+09	9.45006e+08	2.68645e+08
	LPG(19:1)-H	C25 H48 O9 N0 P1	523.304	2.95709	0.00791541	8.40587e+06	1.18434e+07	6.52458e+07	3.70088e+07	1.09189e+07
Saccharolipids
DGDG	DGDG(32:0)+HCOO	C48 H89 O17	937.611	10.7288	5.88178e-08	6.84691e+06	6.95637e+06	1.94078e+07	3.74135e+07	9.49886e+06
	DGDG(32:1)+HCOO	C48 H87 O17	935.595	9.82704	1.73599e-10	3.55032e+07	2.92366e+07	1.30209e+08	4.05419e+08	7.49059e+07
	DGDG(32:2)+HCOO	C48 H85 O17	933.579	8.0163	0.000379007	3.3691e+07	3.71692e+07	4.03799e+07	1.01817e+07	1.65769e+07
	DGDG(32:2)+HCOO	C48 H85 O17	933.579	8.86521	1.22745e-12	5.52856e+07	3.55583e+07	1.82863e+08	8.28358e+08	1.56796e+08
	DGDG(33:1)+HCOO	C49 H89 O17	949.611	10.2204	6.18147e-05	5.23464e+06	1.6184e+07	1.53845e+07	5.59077e+07	1.10527e+07
	DGDG(34:1)+HCOO	C50 H91 O17	963.626	9.74694	1.16261e-08	3.10273e+07	3.16288e+07	1.08344e+08	3.6151e+08	5.7719e+07
	DGDG(34:1)+HCOO	C50 H91 O17	963.626	10.7609	5.70818e-10	1.28618e+08	1.07855e+08	4.12953e+08	1.01263e+09	2.2302e+08
	DGDG(34:2)+HCOO	C50 H89 O17	961.611	9.11049	1.98577e-13	2.53771e+07	2.05582e+07	9.46804e+07	5.4881e+08	1.17733e+08
	DGDG(34:2)+HCOO	C50 H89 O17	961.611	9.88161	7.23196e-10	1.48176e+08	9.89301e+07	5.31344e+08	2.15751e+09	3.71311e+08
	DGDG(34:3)+HCOO	C50 H87 O17	959.595	9.08455	1.46973e-13	1.30845e+08	1.08043e+08	5.11998e+08	3.28719e+09	6.47596e+08
	DGDG(34:3)-H	C49 H85 O15	913.589	9.08455	6.46444e-15	4.29402e+06	3.32804e+06	1.67676e+07	1.15837e+08	2.30144e+07
	DGDG(34:4)+HCOO	C50 H85 O17	957.579	8.28856	1.42169e-14	3.00328e+08	2.38827e+08	1.29507e+09	8.04718e+09	2.03339e+09
	DGDG(34:4)-H	C49 H83 O15	911.574	8.28856	9.01546e-15	1.06198e+07	8.4106e+06	4.49079e+07	2.89138e+08	7.56573e+07
	DGDG(34:5)+HCOO	C50 H83 O17	955.564	7.44358	5.45277e-15	5.96237e+06	4.10951e+06	2.41354e+07	4.70148e+08	5.29831e+07
	DGDG(35:1)+HCOO	C51 H93 O17	977.642	11.1404	0.0279108	4.72148e+07	3.17852e+07	5.58111e+07	8.35953e+07	2.53191e+07
	DGDG(35:1)+HCOO	C51 H93 O17	977.642	11.4149	3.10994e-08	1.68556e+07	1.38387e+07	3.58585e+07	1.31163e+08	2.18694e+07
	DGDG(35:2)+HCOO	C51 H91 O17	975.626	10.3978	1.17796e-06	3.39713e+07	2.09336e+07	4.96551e+07	1.0341e+08	3.21262e+07
	DGDG(35:3)+HCOO	C51 H89 O17	973.611	9.77015	6.09853e-05	6.27368e+06	1.19116e+07	8.68273e+06	4.83507e+07	7.42026e+06
	DGDG(35:3)+HCOO	C51 H89 O17	973.611	13.1604	4.09179e-07	490404	589112	955652	2.8959e+06	693660
	DGDG(36:0)+HCOO	C52 H97 O17	993.673	12.7117	8.29766e-05	2.79401e+06	3.00902e+06	5.61294e+06	1.67989e+07	3.31807e+06
	DGDG(36:1)+HCOO	C52 H95 O17	991.657	11.6818	1.15252e-05	2.46464e+07	1.29182e+07	3.88411e+07	8.70135e+07	1.60685e+07
	DGDG(36:2)+HCOO	C52 H93 O17	989.642	10.7584	5.26033e-07	8.35711e+07	4.03374e+07	1.44026e+08	2.57156e+08	7.1594e+07
	DGDG(36:2)+HCOO	C52 H93 O17	989.642	11.0443	0.0127208	1.40711e+08	9.51619e+07	2.42981e+08	2.33229e+08	8.13112e+07
	DGDG(36:3)+HCOO	C52 H91 O17	987.626	10.0916	3.36766e-13	1.26139e+07	8.20423e+06	4.24545e+07	2.42856e+08	5.00166e+07
	DGDG(36:4)+HCOO	C52 H89 O17	985.611	9.35547	4.72872e-14	3.58565e+07	2.47107e+07	1.28559e+08	8.63872e+08	1.67379e+08
	DGDG(36:5)+HCOO	C52 H87 O17	983.595	8.52624	7.66354e-15	1.9277e+07	1.40434e+07	7.12266e+07	7.3875e+08	1.16572e+08
	DGDG(36:6)+HCOO	C52 H85 O17	981.579	7.72739	2.56257e-15	5.36288e+07	3.96989e+07	2.40708e+08	2.79548e+09	4.54555e+08
	DGDG(36:8)-H	C51 H79 O15	931.542	10.577	0.000203231	9.97228e+06	9.34978e+06	5.72516e+06	4.90818e+06	7.39032e+06
	DGDG(37:1)+HCOO	C53 H97 O17	1005.67	12.1023	0.0145614	9.93992e+06	4.63429e+06	1.04279e+07	1.6193e+07	3.35303e+06
	DGDG(37:2)+HCOO	C53 H95 O17	1003.66	11.1605	0.00094053	2.18939e+08	1.06113e+08	2.58804e+08	4.10397e+08	1.08143e+08
	DGDG(37:2)-H	C52 H93 O15	957.652	11.1605	0.000504519	1.10786e+07	4.8828e+06	1.28216e+07	2.0434e+07	5.4071e+06
	DGDG(37:3)+HCOO	C53 H93 O17	1001.64	10.5739	0.00133913	1.11107e+07	8.04765e+06	1.58797e+07	2.7518e+07	8.58319e+06
	DGDG(38:2)+HCOO	C54 H97 O17	1017.67	11.2545	0.00148943	5.01951e+07	2.02199e+07	4.97266e+07	8.10484e+07	2.45566e+07
	DGDG(45:11)+HCOO	C61 H93 O17	1097.64	9.31859	0.000101139	1.12191e+07	1.16008e+07	2.55792e+07	3.23662e+07	1.13811e+07
	DGDG(45:12)+HCOO	C61 H91 O17	1095.63	7.48872	3.7929e-09	3.7621e+07	4.31312e+07	4.05601e+07	3.46126e+06	1.55833e+07
	DGDG(45:12)+HCOO	C61 H91 O17	1095.63	8.33087	1.84691e-05	1.79892e+07	1.84206e+07	5.1786e+07	5.28345e+07	2.06572e+07
	DGDG(45:2)-H	C60 H109 O15	1069.78	13.3948	0.000305854	1.34155e+07	3.99801e+06	3.3682e+07	5.18815e+06	9.54544e+06
	DGDG(45:3)-H	C60 H107 O15	1067.76	12.4126	0.000367017	8.49448e+07	3.30803e+07	1.63107e+08	2.35024e+07	4.97459e+07
	DGDG(45:4)-H	C60 H105 O15	1065.75	11.644	0.000239759	6.50177e+07	3.70942e+07	1.49978e+08	1.8748e+07	3.27974e+07
	DGDG(45:5)-H	C60 H103 O15	1063.73	10.935	0.00267604	4.19323e+07	2.40931e+07	6.38886e+07	1.55808e+07	2.25891e+07
	DGDG(45:5)-H	C60 H103 O15	1063.73	11.2001	0.0218995	2.85431e+08	9.42585e+07	4.14136e+08	1.85086e+08	1.32802e+08
	DGDG(46:10)+HCOO	C62 H97 O17	1113.67	10.3365	1.79207e-06	9.20553e+06	1.02912e+07	1.86561e+07	3.64109e+07	1.04076e+07
	DGDG(46:11)+HCOO	C62 H95 O17	1111.66	8.3438	0.016374	5.0884e+07	7.00028e+07	7.43139e+07	3.08881e+07	3.38738e+07
	DGDG(46:11)+HCOO	C62 H95 O17	1111.66	9.41516	7.28776e-08	2.82382e+07	2.5435e+07	6.35978e+07	9.29988e+07	3.46984e+07
	DGDG(46:12)+HCOO	C62 H93 O17	1109.64	8.44132	1.41712e-07	4.1723e+07	3.39037e+07	1.3172e+08	1.70828e+08	5.3594e+07
	DGDG(47:11)+HCOO	C63 H97 O17	1125.67	10.2909	7.99532e-05	3.25057e+07	3.29093e+07	6.2308e+07	1.10642e+08	3.03313e+07
	DGDG(47:12)+HCOO	C63 H95 O17	1123.66	8.78351	1.05861e-09	9.76021e+06	8.30485e+06	2.14769e+07	6.44344e+07	1.47781e+07
	DGDG(47:12)+HCOO	C63 H95 O17	1123.66	9.40477	6.66746e-05	4.89811e+07	4.22804e+07	9.16544e+07	1.1744e+08	4.58081e+07
	DGDG(47:13)+HCOO	C63 H93 O17	1121.64	8.63615	6.85418e-09	3.41909e+07	3.74155e+07	9.07972e+07	2.74408e+08	7.68136e+07
	DGDG(47:14)+HCOO	C63 H91 O17	1119.63	6.958	3.95138e-06	1.90763e+06	2.44543e+06	5.94447e+06	1.40217e+07	2.49571e+06
	DGDG(47:14)+HCOO	C63 H91 O17	1119.63	7.75467	3.10411e-11	1.16362e+08	1.15853e+08	4.57808e+08	1.32983e+09	3.12548e+08
	DGDG(47:15)+HCOO	C63 H89 O17	1117.61	6.90143	5.57325e-11	1.86047e+06	1.99725e+06	9.69338e+06	5.69338e+07	6.56672e+06
	DGDG(47:5)-H	C62 H107 O15	1091.76	12.0335	0.00347863	7.16857e+07	2.22667e+07	1.30692e+08	5.78313e+07	3.09931e+07
	DGDG(48:11)+HCOO	C64 H99 O17	1139.69	10.3722	3.75547e-08	8.14684e+07	7.59577e+07	1.86924e+08	3.61129e+08	9.50163e+07
	DGDG(48:12)+HCOO	C64 H97 O17	1137.67	9.55182	8.46487e-11	1.09464e+08	1.03382e+08	3.65123e+08	9.51575e+08	1.90463e+08
	DGDG(48:13)+HCOO	C64 H95 O17	1135.66	8.71903	7.93479e-10	1.2626e+08	1.22877e+08	3.6532e+08	1.21554e+09	2.5018e+08
	DGDG(48:13)-H	C63 H93 O15	1089.65	8.71903	2.791e-11	2.67577e+06	2.63416e+06	8.59396e+06	3.29013e+07	6.72442e+06
	DGDG(48:14)+HCOO	C64 H93 O17	1133.64	7.86046	1.10826e-12	2.06178e+08	1.83306e+08	7.93176e+08	2.04351e+09	6.51906e+08
	DGDG(48:15)+HCOO	C64 H91 O17	1131.63	7.02012	1.51178e-12	3.37448e+06	3.40787e+06	1.91483e+07	1.14195e+08	1.38597e+07
	DGDG(30:0)+Na	C45 H84 O15 Na1	887.57	11.4726	0.0438433	6.50936e+07	9.47596e+07	6.08777e+07	1.27929e+08	1.00535e+08
	DGDG(49:11)+HCOO	C65 H101 O17	1153.7	10.9026	0.00030576	1.67324e+07	1.43117e+07	3.1966e+07	3.88553e+07	1.51148e+07
	DGDG(32:1)+Na	C47 H86 O15 Na1	913.586	9.81946	7.60726e-12	2.23761e+07	2.16523e+07	6.53314e+07	1.46556e+08	8.58277e+07
	DGDG(32:2)+Na	C47 H84 O15 Na1	911.57	8.85315	1.26487e-15	5.11414e+07	4.08075e+07	1.5722e+08	9.53821e+08	2.75392e+08
	DGDG(49:14)+HCOO	C65 H95 O17	1147.66	8.83539	2.1428e-09	1.17128e+07	1.13197e+07	3.2501e+07	9.99523e+07	2.03781e+07
	DGDG(33:1)+Na	C48 H88 O15 Na1	927.602	10.3109	4.06008e-11	3.90997e+06	5.22143e+06	9.19828e+06	4.81782e+07	1.49686e+07
	DGDG(34:1)+Na	C49 H90 O15 Na1	941.617	10.7702	8.21921e-13	9.3819e+07	8.20542e+07	1.82104e+08	4.03121e+08	2.16911e+08
	DGDG(49:16)-H	C64 H89 O15	1097.62	7.19118	5.61406e-10	991575	974822	4.01624e+06	2.22173e+07	2.88235e+06
	DGDG(49:16)+HCOO	C65 H91 O17	1143.63	7.19118	3.95453e-11	1.97836e+07	1.95671e+07	8.18435e+07	4.30959e+08	5.59053e+07
	DGDG(50:10)+HCOO	C66 H105 O17	1169.74	12.2437	0.00942214	1.99773e+06	2.00951e+06	2.5814e+06	5.20074e+06	1.51482e+06
	DGDG(50:11)+HCOO	C66 H103 O17	1167.72	11.3204	0.000166019	5.14476e+06	5.02809e+06	8.46813e+06	1.53546e+07	4.8578e+06
	DGDG(34:4)+Na	C49 H84 O15 Na1	935.57	8.28244	2.42961e-16	2.40878e+08	2.46112e+08	9.06178e+08	5.45289e+09	2.87283e+09
	DGDG(50:12)+HCOO	C66 H101 O17	1165.7	10.4493	2.74493e-06	6.2985e+06	5.29387e+06	1.46008e+07	2.76957e+07	8.177e+06
	DGDG(50:13)+HCOO	C66 H99 O17	1163.69	9.70198	4.33288e-10	7.76371e+06	6.58642e+06	2.42925e+07	8.37199e+07	1.8367e+07
	DGDG(34:5)+Na	C49 H82 O15 Na1	933.555	7.4401	1.04775e-18	5.42389e+06	5.33334e+06	2.00618e+07	4.97549e+08	1.31977e+08
	DGDG(50:13)+HCOO	C66 H99 O17	1163.69	9.9558	1.23006e-10	3.49944e+06	3.36912e+06	1.03176e+07	2.61655e+07	6.35422e+06
	DGDG(50:14)+HCOO	C66 H97 O17	1161.67	8.94798	1.02794e-10	2.41268e+07	2.10739e+07	7.34332e+07	2.29997e+08	4.74594e+07
	DGDG(35:1)+Na	C50 H92 O15 Na1	955.633	11.363	1.26586e-06	1.12957e+07	1.14411e+07	1.44663e+07	6.49273e+07	3.12388e+07
	DGDG(35:2)+Na	C50 H90 O15 Na1	953.617	10.3292	2.15172e-11	3.46644e+07	1.97093e+07	3.27309e+07	9.13519e+07	4.56696e+07
	DGDG(50:15)+HCOO	C66 H95 O17	1159.66	8.11046	6.22499e-12	1.56106e+07	1.2733e+07	6.01919e+07	2.66794e+08	4.22884e+07
	DGDG(35:3)+Na	C50 H88 O15 Na1	951.602	9.7458	5.24266e-06	3.7125e+06	5.84629e+06	4.6762e+06	2.79861e+07	1.08787e+07
	DGDG(50:16)+HCOO	C66 H93 O17	1157.64	7.30776	5.32496e-13	2.81223e+07	2.52147e+07	1.10964e+08	6.57679e+08	9.31282e+07
	DGDG(58:13)-H	C73 H113 O15	1229.81	11.7451	0.000193137	2.10167e+07	1.1083e+07	5.04025e+07	5.61884e+06	1.20129e+07
	DGDG(36:1)+Na	C51 H94 O15 Na1	969.648	11.6907	2.33518e-14	1.18218e+07	7.91611e+06	1.50183e+07	6.31075e+07	2.41141e+07
	DGDG(36:2)+Na	C51 H92 O15 Na1	967.633	10.7766	8.18625e-07	6.90206e+07	3.91429e+07	7.11006e+07	1.27197e+08	7.09894e+07
	DGDG(36:2)+Na	C51 H92 O15 Na1	967.633	11.0378	2.14135e-06	3.41598e+07	2.71798e+07	4.28633e+07	8.68044e+07	4.70337e+07
	DGDG(36:3)+Na	C51 H90 O15 Na1	965.617	10.1852	3.1318e-14	1.42283e+07	1.06054e+07	2.6639e+07	1.40901e+08	5.31865e+07
	DGDG(36:4)+Na	C51 H88 O15 Na1	963.602	9.35553	3.73378e-16	3.93126e+07	3.57744e+07	1.20361e+08	7.87268e+08	3.02144e+08
	DGDG(36:5)+Na	C51 H86 O15 Na1	961.586	8.53224	2.19945e-12	2.23902e+07	1.56787e+07	7.67818e+07	4.01552e+08	1.86314e+08
	DGDG(36:6)+Na	C51 H84 O15 Na1	959.57	7.7181	1.44735e-17	3.34528e+07	2.90967e+07	1.55679e+08	2.87305e+09	7.83874e+08
	DGDG(36:6)+H	C51 H85 O15	937.588	9.27246	3.02005e-15	1.29239e+08	1.39103e+08	4.34159e+08	1.81378e+09	9.81668e+08
	DGDG(60:15)-H	C75 H113 O15	1253.81	11.4077	0.00273375	2.093e+07	9.33655e+06	5.05062e+07	1.25864e+07	1.21639e+07
	DGDG(37:2)+Na	C52 H94 O15 Na1	981.648	11.1608	1.90588e-05	6.04474e+07	4.05672e+07	4.80766e+07	1.21558e+08	6.90525e+07
	DGDG(29:4)-H	C44 H73 O15	841.495	2.056	0.557138	9.81266e+08	1.15558e+09	1.0788e+09	1.64838e+09	6.34845e+08
	DGDG(31:2)+HCOO	C47 H83 O17	919.564	8.38304	0.611546	1.39142e+07	1.44531e+07	1.69854e+07	1.68923e+07	1.51883e+07
	DGDG(31:3)+HCOO	C47 H81 O17	917.548	9.67512	0.0590005	1.48854e+07	1.12329e+07	1.99985e+07	2.55578e+07	4.91092e+06
	DGDG(37:11)+HCOO	C53 H77 O17	985.517	8.162	0.77724	2.75071e+06	3.29199e+06	3.33985e+06	6.6589e+06	3.86679e+06
	DGDG(41:11)-H	C56 H83 O15	995.574	12.204	0.965196	5.62564e+07	4.89346e+07	5.65421e+07	1.05011e+08	1.77964e+07
	DGDG(46:10)+HCOO	C62 H97 O17	1113.67	9.29269	0.396325	1.89799e+07	2.58747e+07	3.05405e+07	1.93807e+07	9.78614e+06
	DGDG(49:12)+HCOO	C65 H99 O17	1151.69	10.08	0.106534	4.42836e+07	4.66709e+07	6.92059e+07	6.32787e+07	7.56243e+07
	DGDG(37:3)+Na	C52 H92 O15 Na1	979.633	10.5777	0.191155	7.73281e+06	7.7639e+06	8.03886e+06	1.25029e+07	9.18057e+06
DGMG	DGMG(16:0)+HCOO	C32 H59 O16	699.381	2.83592	0.00866914	6.51324e+07	6.51977e+07	9.53394e+08	4.37932e+08	1.86353e+08
	DGMG(16:0)-H	C31 H57 O14	653.375	2.83592	4.21457e-06	5.86255e+06	6.20623e+06	9.17568e+07	4.74067e+07	1.84246e+07
	DGMG(16:1)+HCOO	C32 H57 O16	697.365	2.2621	0.00966942	4.8399e+07	3.73049e+07	6.91927e+08	7.11148e+08	1.42713e+08
	DGMG(18:0)+HCOO	C34 H63 O16	727.412	3.91709	1.30677e-05	4.67556e+06	5.24297e+06	3.52656e+07	2.75552e+07	6.65247e+06
	DGMG(18:1)+HCOO	C34 H61 O16	725.397	2.95111	0.0140403	2.24578e+07	1.63941e+07	2.52059e+08	1.16494e+08	4.41515e+07
	DGMG(30:10)+HCOO	C46 H67 O16	875.443	2.64153	0.0061902	1.70556e+07	1.53078e+07	1.79286e+08	1.66095e+08	4.26317e+07
	DGMG(18:3)+HCOO	C34 H57 O16	721.365	2.15155	0.0525055	2.96124e+07	1.96795e+07	1.22774e+08	7.81455e+08	9.59291e+07
	DGMG(29:4)-H	C44 H75 O14	827.516	2.273	0.948216	1.06299e+09	1.11102e+09	1.07276e+09	1.20712e+09	4.27933e+08
	DGMG(29:5)+HCOO	C45 H75 O16	871.506	2.1994	0.346917	1.02481e+09	7.85965e+08	9.41937e+08	6.69948e+08	2.27396e+08
	DGMG(29:5)-H	C44 H73 O14	825.501	2.1994	0.352083	2.98432e+09	2.36171e+09	2.8904e+09	2051041974	7.34067e+08
	DGMG(34:4)+HCOO	C50 H87 O16	943.6	11.1524	0.512829	1.31515e+07	1.2153e+07	8.49762e+06	1.05065e+07	6.03913e+06
	DGMG(35:4)+HCOO	C51 H89 O16	957.616	10.346	0.461648	2.71952e+08	2.32391e+08	3.28484e+08	2.64936e+08	135944859
	DGMG(36:10)-H	C51 H77 O14	913.532	9.59	0.169584	1.50005e+07	1.26155e+07	1.14056e+07	1.25787e+07	1.2396e+07
MGDG	MGDG(32:1)+Na	C41 H76 O10 Na1	751.533	10.5259	2.90316e-16	7.84085e+07	5.91225e+07	1.65547e+08	8.4921e+08	3.27682e+08
	MGDG(32:2)+Na	C41 H74 O10 Na1	749.517	9.6137	6.82832e-14	8.77205e+07	5.28973e+07	2.25462e+08	1.85239e+09	5.87713e+08
	MGDG(34:0)+Na	C43 H82 O10 Na1	781.58	12.4947	7.47881e-21	2.88361e+07	3.14025e+07	6.40145e+07	5.52817e+08	1.44384e+08
	MGDG(34:1)+Na	C43 H80 O10 Na1	779.564	11.4405	1.83514e-11	2.59596e+08	1.92654e+08	4.35454e+08	1.84225e+09	1.04194e+09
	MGDG(34:2)+Na	C43 H78 O10 Na1	777.549	10.577	2.53204e-16	1.82635e+08	1.08967e+08	4.39027e+08	4.65214e+09	1903745710
	MGDG(34:3)+Na	C43 H76 O10 Na1	775.533	9.80662	3.13045e-16	6.91663e+07	5.35367e+07	2.86179e+08	2.88301e+09	1.176e+09
	MGDG(32:0)+HCOO	C42 H79 O12	775.558	10.8906	2.07709e-05	2.10901e+08	3.16349e+08	6.75245e+08	1.0972e+08	1.87618e+08
	MGDG(32:1)+HCOO	C42 H77 O12	773.542	10.5448	1.2297e-11	1.15887e+08	7.63689e+07	3.60178e+08	1.70392e+09	3.07249e+08
	MGDG(32:2)+HCOO	C42 H75 O12	771.526	9.08255	2.59811e-05	2.23355e+08	2.96774e+08	7.20235e+08	6.94367e+07	1.32826e+08
	MGDG(34:4)+Na	C43 H74 O10 Na1	773.517	9.02658	5.00771e-12	5.33017e+08	3.84234e+08	1.55843e+09	4.08844e+09	5.0782e+09
	MGDG(32:3)+HCOO	C42 H73 O12	769.511	8.80586	1.48757e-14	4.53896e+06	1.9581e+06	1.68068e+07	3.16683e+08	5.7605e+07
	MGDG(32:6)+HCOO	C42 H67 O12	763.464	7.4462	0.00790752	7.91541e+06	9.54258e+06	2.78757e+07	2.63503e+07	5.63501e+06
	MGDG(33:0)+HCOO	C43 H81 O12	789.573	11.3279	7.36715e-05	3.39271e+06	3.0923e+06	4.13828e+06	1.73332e+07	2.53746e+06
	MGDG(33:0)+HCOO	C43 H81 O12	789.573	11.7743	3.47744e-09	3.21189e+06	2.13252e+06	8.9339e+06	7.63064e+07	6.02854e+06
	MGDG(34:5)+Na	C43 H72 O10 Na1	771.502	8.20446	2.40627e-19	1.04469e+07	7.7554e+06	3.96831e+07	1.13007e+09	3.91819e+08
	MGDG(33:1)+HCOO	C43 H79 O12	787.558	11.0184	3.20846e-12	1.83277e+07	1.32425e+07	6.81402e+07	4.03155e+08	6.19068e+07
	MGDG(35:1)+Na	C44 H82 O10 Na1	793.58	11.9704	1.90978e-15	2.70636e+07	1.77654e+07	2.52226e+07	2.72358e+08	4.00036e+07
	MGDG(35:2)+Na	C44 H80 O10 Na1	791.564	11.0711	4.10892e-18	2.09545e+07	1.51762e+07	3.69559e+07	3.04512e+08	6.72946e+07
	MGDG(34:0)+HCOO	C44 H83 O12	803.589	12.5317	5.43954e-08	8.35381e+07	7.8043e+07	2.19077e+08	1.07802e+09	1.70359e+08
	MGDG(36:1)+Na	C45 H84 O10 Na1	807.596	12.4749	3.13291e-16	7.67697e+07	5.31924e+07	8.23477e+07	4.47381e+08	1.50371e+08
	MGDG(36:2)+Na	C45 H82 O10 Na1	805.58	11.4395	0.000476413	2.58093e+08	2.54854e+08	1.81627e+08	1.40644e+08	1.89328e+08
	MGDG(34:1)+HCOO	C44 H81 O12	801.573	10.6926	1.94817e-11	8.78311e+07	5.07673e+07	2.19192e+08	1.46219e+09	4.80632e+08
	MGDG(36:2)+Na	C45 H82 O10 Na1	805.58	11.6795	2.99363e-14	1.66738e+07	2.01547e+07	1.24156e+07	2.5937e+08	3.41836e+07
	MGDG(36:3)+Na	C45 H80 O10 Na1	803.564	10.8721	6.13638e-15	1.52376e+08	1.73689e+08	1.83778e+08	9.75638e+08	3.4481e+08
	MGDG(36:4)+Na	C45 H78 O10 Na1	801.549	10.0863	2.92153e-17	6.37382e+07	4.06309e+07	1.64443e+08	1.61527e+09	6.84486e+08
	MGDG(34:1)+HCOO	C44 H81 O12	801.573	11.463	1.11453e-11	6.02408e+08	3.62738e+08	1.82715e+09	8774491398	1.27927e+09
	MGDG(36:5)+Na	C45 H76 O10 Na1	799.533	9.24263	2.87035e-17	4.50703e+07	3.0472e+07	1.53469e+08	2090550373	8.90231e+08
	MGDG(36:6)+Na	C45 H74 O10 Na1	797.517	8.46784	3.11938e-17	8.24872e+07	5.29366e+07	3.15951e+08	3.86529e+09	2.0344e+09
	MGDG(36:6)+H	C45 H75 O10	775.535	10.0124	5.77191e-16	2.41679e+08	1.55526e+08	5.54931e+08	4.33458e+09	2.0976e+09
	MGDG(34:2)+HCOO	C44 H79 O12	799.558	10.0748	4.48218e-11	1.56068e+08	1.44611e+08	4.17041e+08	1.8822e+09	4.38229e+08
	MGDG(34:2)+HCOO	C44 H79 O12	799.558	10.626	3.95984e-14	3.43609e+08	1.91719e+08	1.2208e+09	1.48547e+10	3.36323e+09
	MGDG(37:1)+Na	C46 H86 O10 Na1	821.611	12.9729	3.05869e-06	1.05402e+07	6.41961e+06	7.7658e+06	2.39496e+07	1.23951e+07
	MGDG(37:2)+Na	C46 H84 O10 Na1	819.596	11.9089	7.30273e-07	7.67568e+07	4.84251e+07	5.39576e+07	1.68952e+08	8.07429e+07
	MGDG(37:2)+Na	C46 H84 O10 Na1	819.596	12.198	9.65926e-12	9.09062e+06	9.41773e+06	1.01856e+07	4.36863e+07	1.7666e+07
	MGDG(37:3)+Na	C46 H82 O10 Na1	817.58	11.3548	1.05867e-14	3.06489e+06	3.23549e+06	3.15713e+06	2.68403e+07	7.24745e+06
	MGDG(34:3)+HCOO	C44 H77 O12	797.542	9.84851	2.68674e-13	1.00376e+08	6.81607e+07	4.86776e+08	6.42443e+09	1042661968
	MGDG(38:2)+Na	C47 H86 O10 Na1	833.611	12.4272	3.57344e-08	6.33281e+06	5.57982e+06	5.93272e+06	2.06797e+07	9.73594e+06
	MGDG(38:3)+H	C47 H85 O10	809.614	13.598	1.18444e-18	6.64884e+06	6.73508e+06	1.25693e+07	7.22453e+07	2.39907e+07
	MGDG(34:4)+HCOO	C44 H75 O12	795.526	9.05166	6.21395e-12	6.06766e+08	3.8181e+08	2.21762e+09	24183733672	5.82527e+09
	MGDG(43:9)+Na	C52 H82 O10 Na1	889.58	11.214	0.00406579	1.45259e+07	2.33335e+07	2.85571e+07	3.50094e+07	3.60541e+07
	MGDG(47:12)+Na	C56 H84 O10 Na1	939.596	9.895	1.20031e-08	9.54861e+07	7.45253e+07	1.80955e+08	6.60459e+08	2.86895e+08
	MGDG(34:4)+HCOO	C44 H75 O12	795.526	11.7183	2.31408e-06	7.95912e+06	8.10471e+06	1.8935e+07	5.54489e+07	1.29344e+07
	MGDG(34:5)+HCOO	C44 H73 O12	793.511	8.78117	1.27349e-06	3.5358e+08	5.26952e+08	7.13703e+08	5.31371e+07	2.35353e+08
	MGDG(34:5)-H	C43 H71 O10	747.505	9.32613	0.00243077	3.50781e+07	3.30001e+07	4.26074e+07	2.40166e+08	3.57572e+07
	MGDG(35:0)+HCOO	C45 H85 O12	817.605	12.8489	4.00661e-08	3.28223e+06	2.27997e+06	7.62053e+06	4.05344e+07	6.29144e+06
	MGDG(35:1)+HCOO	C45 H83 O12	815.589	11.5307	5.5488e-12	9.23757e+06	8.49798e+06	2.7263e+07	1.88927e+08	2.46228e+07
	MGDG(35:1)+HCOO	C45 H83 O12	815.589	11.9805	8.30103e-09	5.64697e+07	2.97327e+07	8.58771e+07	4.70906e+08	5.5864e+07
	MGDG(35:1)+HCOO	C45 H83 O12	815.589	12.234	3.16273e-10	7.59571e+07	5.59371e+07	2.21673e+08	1.47767e+09	1.97477e+08
	MGDG(35:2)+HCOO	C45 H81 O12	813.573	11.0995	7.82804e-12	5.38668e+07	3.93146e+07	1.76017e+08	981489708	1.05273e+08
	MGDG(35:3)+HCOO	C45 H79 O12	811.558	10.3082	4.37066e-14	9.15639e+06	8.00331e+06	2.37764e+07	3.24034e+08	3.91088e+07
	MGDG(35:4)+HCOO	C45 H77 O12	809.542	9.897	1.51946e-14	6.75774e+06	6.45576e+06	3.05987e+07	5.18888e+08	6.48803e+07
	MGDG(36:0)+HCOO	C46 H87 O12	831.62	13.6355	6.27786e-07	1.17829e+07	9.86777e+06	2.38965e+07	8.5069e+07	2.31249e+07
	MGDG(36:1)+HCOO	C46 H85 O12	829.605	12.4736	3.72559e-05	1.78531e+08	1.07242e+08	2.24987e+08	6.46051e+08	1.40215e+08
	MGDG(36:2)+HCOO	C46 H83 O12	827.589	11.7809	0.0142371	6.66161e+07	5.69751e+07	9.59363e+07	3.93725e+08	4.35596e+07
	MGDG(36:3)+HCOO	C46 H81 O12	825.573	10.8711	7.39351e-05	5.14337e+08	5.58169e+08	8.30245e+08	1.945e+09	5.47077e+08
	MGDG(36:4)+HCOO	C46 H79 O12	823.558	10.0774	1.55106e-15	8.21855e+07	5.94979e+07	3.05284e+08	3.49678e+09	7.10984e+08
	MGDG(36:5)-H	C45 H75 O10	775.537	9.93933	0.0451897	1.38428e+08	1.0081e+08	1.60373e+08	8.60033e+07	6.3314e+07
	MGDG(36:5)+HCOO	C46 H77 O12	821.542	10.3608	0.00254325	5.56335e+08	7.11606e+08	1.27893e+09	1.97289e+09	4.50268e+08
	MGDG(36:6)+HCOO	C46 H75 O12	819.526	8.48248	4.59253e-10	1.27519e+08	9.43767e+07	3.95332e+08	6.62109e+09	1.54302e+09
	MGDG(36:6)+HCOO	C46 H75 O12	819.526	9.45841	4.81473e-05	5.23391e+09	5.20618e+09	9.99307e+09	1.38727e+10	5.08475e+09
	MGDG(36:7)+HCOO	C46 H73 O12	817.511	8.697	1.38976e-08	1.15022e+09	1.45822e+09	4.06928e+09	1.07325e+10	2.43059e+09
	MGDG(37:1)+HCOO	C47 H87 O12	843.62	12.9853	0.0044121	1.66253e+07	7.16132e+06	1.4747e+07	3.54588e+07	9.81273e+06
	MGDG(37:2)+HCOO	C47 H85 O12	841.605	11.9107	0.0058991	1.12271e+08	5.64016e+07	1.0423e+08	2.36693e+08	6.11992e+07
	MGDG(37:3)+HCOO	C47 H83 O12	839.589	11.3492	9.02632e-05	8.53382e+06	8.06714e+06	1.24205e+07	2.96497e+07	8.88292e+06
	MGDG(38:2)+HCOO	C48 H87 O12	855.62	12.435	0.0356724	1.47702e+07	9.97517e+06	1.70446e+07	3.08153e+07	9.7487e+06
	MGDG(38:4)+HCOO	C48 H83 O12	851.589	10.9221	9.08785e-12	4.54565e+06	3.57251e+06	7.72969e+06	8.59056e+07	1.11257e+07
	MGDG(23:0)+HCOO	C33 H61 O12	649.417	2.69252	0.201427	5.68381e+07	6.57486e+07	9.12418e+07	8.66954e+07	3.42973e+07
	MGDG(26:0)-H	C35 H65 O10	645.458	5.36672	0.627169	5.67442e+07	6.51965e+07	7.5934e+07	6.79122e+07	3.14767e+07
	MGDG(26:1)+HCOO	C36 H65 O12	689.448	5.96348	0.201917	3.46932e+07	3.59496e+07	2.45828e+07	2.72463e+07	2.14175e+07
	MGDG(34:5)+HCOO	C44 H73 O12	793.511	9.32613	0.365614	6.60934e+08	1.07935e+09	1.07149e+09	1.08474e+09	5.19514e+08
	MGDG(36:1)+HCOO	C46 H85 O12	829.605	11.888	0.0894109	4.87267e+06	5.38633e+06	7.19614e+06	3.16696e+07	3.95355e+06
	MGDG(36:2)+HCOO	C46 H83 O12	827.589	11.4486	0.19077	1.00826e+09	7.56993e+08	1.18293e+09	9.50842e+08	4.7427e+08
	MGDG(37:5)+HCOO	C47 H79 O12	835.558	10.843	0.163362	3.7371e+07	5.03858e+07	7.53173e+07	6.28559e+07	2.31046e+07
	MGDG(38:5)+HCOO	C48 H81 O12	849.573	11.2411	0.127148	1.30593e+08	1.65091e+08	2.15764e+08	3.02919e+08	8.56112e+07
	MGDG(47:12)+HCOO	C57 H85 O12	961.605	7.06681	0.0804167	1.77156e+08	1.44039e+08	8.96724e+07	9.49241e+07	6.12847e+07
MGMG	MGMG(16:0)+HCOO	C26 H49 O11	537.328	3.33323	0.012189	3.12711e+08	2.72554e+08	6.9897e+09	4.16418e+09	1484227281
	MGMG(16:0)-H	C25 H47 O9	491.323	3.33323	0.0134209	1.12351e+07	9.25434e+06	2.73277e+08	1.64766e+08	5.62407e+07
	MGMG(16:1)-H	C25 H45 O9	489.307	2.60908	0.0187314	1.13429e+07	6.40797e+06	2.1902e+08	2.08865e+08	5.65051e+07
	MGMG(16:1)+HCOO	C26 H47 O11	535.312	2.60908	0.0059558	2.83706e+08	1.7153e+08	5.37055e+09	4.78985e+09	1.30266e+09
	MGMG(17:1)+HCOO	C27 H49 O11	549.328	3.06368	0.0153197	5.57906e+06	4.47773e+06	1.23413e+08	9.1572e+07	2.38509e+07
	MGMG(18:0)+HCOO	C28 H53 O11	565.359	4.65361	1.06493e-05	2.57553e+07	3.90465e+07	9.64763e+07	8.73786e+07	2.85848e+07
	MGMG(18:1)-H	C27 H49 O9	517.338	3.47001	0.0379557	6.34729e+06	4.89447e+06	4.20033e+07	2.4685e+07	8.05383e+06
	MGMG(18:1)+HCOO	C28 H51 O11	563.344	3.47001	0.0159676	2.9519e+08	3.79551e+08	1.38992e+09	5.36917e+08	3.55373e+08
	MGMG(18:2)+HCOO	C28 H49 O11	561.328	2.86492	0.00954019	2.34542e+07	1.20175e+07	1.65674e+08	5.62624e+08	9.1324e+07
	MGMG(18:3)+HCOO	C28 H47 O11	559.312	2.45122	0.0135928	5.94501e+07	2.90896e+07	2.44658e+08	1.79257e+09	1.97323e+08
	MGMG(20:0)+HCOO	C30 H57 O11	593.391	6.14624	0.000730257	5.97726e+06	6.83409e+06	7.50602e+06	2.26522e+06	2.07832e+06
	MGMG(22:0)+HCOO	C32 H61 O11	621.422	1.94866	1.33634e-06	8.11573e+07	8.42801e+07	2.60901e+08	2.58132e+08	8.98311e+07
	MGMG(33:4)+HCOO	C43 H75 O11	767.531	9.63234	0.000109977	1.19079e+07	9.46521e+07	4.31148e+07	1.87781e+08	2.93985e+07
	MGMG(23:1)+HCOO	C33 H61 O11	633.422	3.34055	0.458184	7.78771e+06	8.02101e+06	1.04653e+07	8.5985e+06	3.97353e+06
	MGMG(25:0)+HCOO	C35 H67 O11	663.469	3.73964	0.741073	5.17035e+09	5.16798e+09	4636438058	4.4767e+09	2.59633e+09
	MGMG(32:4)+HCOO	C42 H73 O11	753.516	9.22344	0.138483	1.31394e+06	1.01525e+08	3.93775e+06	8.42281e+06	1.7896e+07
SQDG	SQDG(32:1)-H	C41 H75 O12 S1	791.498	8.50488	0.00168966	9.82626e+08	1.18775e+09	2377174047	3.1647e+09	8.73281e+08
	SQDG(32:2)-H	C41 H73 O12 S1	789.483	7.58856	0.00198442	2.01328e+07	2.92695e+07	5.01444e+07	9.6597e+07	1.9474e+07
	SQDG(32:3)-H	C41 H71 O12 S1	787.467	6.84913	1.18938e-08	2.18917e+06	2.75595e+06	1.09049e+07	5.2466e+07	6.01678e+06
	SQDG(33:2)-H	C42 H75 O12 S1	803.498	8.21059	1.53213e-08	7.89365e+06	9.77733e+06	3.56162e+07	1.05562e+08	1.50587e+07
	SQDG(33:3)+HCOO	C43 H75 O14 S1	847.488	5.92537	7.59849e-05	1.13574e+08	5.40126e+07	3.93935e+07	2.61987e+07	2.42929e+07
	SQDG(33:3)-H	C42 H73 O12 S1	801.483	7.45958	1.38675e-07	7.60811e+06	9.40544e+06	3.49797e+07	1.29985e+08	1.53573e+07
	SQDG(34:3)-H	C43 H75 O12 S1	815.498	7.95667	1.45386e-05	4.99193e+09	6.34821e+09	9.47863e+09	2.17762e+10	6.76425e+09
	SQDG(34:3)-H	C43 H75 O12 S1	815.498	9.95246	5.71774e-12	1.9948e+07	1.36718e+07	2.4555e+07	9.08728e+07	3.52216e+07
	SQDG(34:4)-H	C43 H73 O12 S1	813.483	7.00916	5.68602e-10	3.75918e+07	5.30042e+07	1.92534e+08	1.25434e+09	1.27939e+08
	SQDG(35:1)-H	C44 H81 O12 S1	833.545	9.957	0.0106248	8.15921e+08	1.05275e+09	1.80463e+09	2.97897e+09	6.27228e+08
	SQDG(35:2)-H	C44 H79 O12 S1	831.53	9.17099	1.60661e-05	3.56954e+07	5.06645e+07	1.38756e+08	2.40747e+08	5.92707e+07
	SQDG(35:3)-H	C44 H77 O12 S1	829.514	8.564	3.45416e-08	1.44365e+07	1.66515e+07	4.71653e+07	1.74113e+08	2.97708e+07
	SQDG(35:4)+HCOO	C45 H77 O14 S1	873.504	5.9881	9.0164e-06	7.95671e+07	6.31705e+07	6.3225e+07	1.57085e+07	2.26363e+07
	SQDG(36:4)-H	C45 H77 O12 S1	841.514	8.07598	6.10527e-07	5.80382e+07	7.33519e+07	1.86226e+08	5.44702e+08	1.0403e+08
	SQDG(36:4)-H	C45 H77 O12 S1	841.514	9.989	4.67161e-09	5.93442e+07	4.12578e+07	3.35592e+07	1.49384e+07	2.75099e+07
	SQDG(36:5)-H	C45 H75 O12 S1	839.498	7.25091	3.64627e-10	7.49597e+06	9.19664e+06	2.85065e+07	2.30157e+08	2.62656e+07
	SQDG(36:6)-H	C45 H73 O12 S1	837.483	6.49303	1.62423e-10	7.29391e+06	9.44545e+06	3.07422e+07	2.62257e+08	2.83551e+07
	SQDG(36:6)+HCOO	C46 H75 O14 S1	883.488	8.02581	0.00570114	7.28522e+07	7.65286e+07	1.10067e+08	7.78843e+07	1.61218e+08
	SQDG(37:2)-H	C46 H83 O12 S1	859.561	10.0069	0.00483732	1.05775e+07	1.51651e+07	3.2388e+07	3.69376e+07	9.59055e+06
	SQDG(37:3)-H	C46 H81 O12 S1	857.545	9.37932	5.64808e-06	1.31121e+06	1.29888e+06	3.29684e+06	1.26176e+07	1.76542e+06
	SQDG(37:4)+HCOO	C47 H81 O14 S1	901.535	9.955	8.10248e-06	3.34126e+07	3.81629e+07	5.08713e+07	7.07493e+07	4.50808e+07
	SQDG(38:6)-H	C47 H77 O12 S1	865.514	7.47531	5.39366e-08	3.56235e+06	4.87503e+06	1.23541e+07	7.2266e+07	8.27018e+06
	SQDG(40:8)+HCOO	C50 H79 O14 S1	935.52	10.8509	0.0170853	1.05562e+07	1.90868e+07	1.43399e+07	3.97586e+07	5.14647e+07
	SQDG(44:8)+HCOO	C54 H87 O14 S1	991.582	6.7141	0.00286748	2.97054e+07	3.11599e+07	3.10779e+07	8.75704e+06	1.17956e+07
	SQDG(44:9)+HCOO	C54 H85 O14 S1	989.567	5.61835	3.68777e-05	9.15169e+07	1.12653e+08	1.45911e+08	2.00709e+07	4.49974e+07
	SQDG(30:0)-H	C39 H73 O12 S1	765.483	8.38985	0.0701436	1.45111e+07	1.76326e+07	3.54013e+07	7.31537e+07	6.06571e+06
	SQDG(33:0)-H	C42 H79 O12 S1	807.53	9.92693	0.148056	5.88632e+07	6.04196e+07	1.01001e+08	1.1305e+08	3.73082e+07
	SQDG(33:4)+HCOO	C43 H73 O14 S1	845.473	4.78336	0.537883	7.61674e+07	3.6056e+07	5.39581e+07	7.51735e+07	2.72587e+07
	SQDG(36:2)-H	C45 H81 O12 S1	845.545	9.51727	0.303896	4.28797e+08	3.81969e+08	5.37575e+08	4.47713e+08	2.75197e+08
	SQDG(38:7)+HCOO	C48 H77 O14 S1	909.504	11.7508	0.131739	1.42955e+07	1.65619e+07	2.3807e+07	3.42097e+07	1.48077e+07
	SQDG(40:7)+HCOO	C50 H81 O14 S1	937.535	11.5267	0.74949	3.62263e+09	5269183063	5.59759e+09	1.24621e+10	1.10687e+10
	SQDG(40:7)+HCOO	C50 H81 O14 S1	937.535	12.0537	0.556865	3.80497e+08	9.51421e+08	6.87722e+08	2.18325e+09	3.16591e+09
	SQDG(40:7)+HCOO	C50 H81 O14 S1	937.535	13.5049	0.59218	1.42257e+08	1.33988e+08	1.5285e+08	1.31943e+08	7.22194e+07
	SQDG(40:7)+HCOO	C50 H81 O14 S1	937.535	13.8817	0.104065	2.23123e+07	2.54138e+07	3.13096e+07	8.60032e+07	2.01277e+07
	SQDG(44:15)+HCOO	C54 H73 O14 S1	977.473	16.9875	0.790139	1.03827e+07	1.11461e+07	1.37444e+07	2.1081e+07	8.20994e+06
SQMG	SQMG(13:5)+HCOO	C23 H33 O13 S1	549.165	1.31882	5.55314e-09	4.25113e+06	4.1647e+06	3.29823e+07	5.29506e+07	3.02037e+07
	SQMG(16:0)-H	C25 H47 O11 S1	555.284	2.36274	0.00114094	7.43309e+08	1.4766e+09	1.23551e+10	4.71376e+09	2.93148e+09
	SQMG(17:0)-H	C26 H49 O11 S1	569.3	2.68519	0.00788917	9.46097e+06	1.31312e+07	7.45138e+07	2.77143e+07	1.29871e+07
	SQMG(18:0)-H	C27 H51 O11 S1	583.316	3.13377	0.000411299	4.88337e+07	7.95573e+07	1.91373e+08	4.09306e+07	2.78906e+07
	SQMG(18:1)-H	C27 H49 O11 S1	581.3	2.48486	0.00130911	3.10834e+07	7.59784e+07	4.78459e+08	1.54418e+08	9.59008e+07
	SQMG(33:3)+HCOO	C43 H77 O13 S1	833.509	5.931	0.0104513	3.44564e+07	3.27082e+07	2.44643e+08	3.19319e+08	5.88526e+07
	SQMG(33:4)+HCOO	C43 H75 O13 S1	831.493	5.24955	0.000299367	3.16561e+07	3.42311e+07	3.05184e+08	6.72597e+08	1.07546e+08
	SQMG(40:2)+HCOO	C50 H93 O13 S1	933.634	13.9624	0.000708552	7.76149e+06	6.33054e+06	6.06151e+06	2.27271e+06	4.56791e+06
	SQMG(40:3)+HCOO	C50 H91 O13 S1	931.619	12.8766	7.49156e-07	1.77672e+07	1.52109e+07	1.57545e+07	3.55086e+06	1.32529e+07
	SQMG(19:1)-H	C28 H51 O11 S1	595.316	3.03	0.0549528	7.87122e+06	4.99547e+06	1.92966e+07	1.38685e+07	4.07586e+06
	SQMG(28:4)+HCOO	C38 H65 O13 S1	761.415	3.38933	0.0907519	1.52806e+07	1.34392e+07	2.78166e+07	2.95364e+07	7.96336e+06
	SQMG(33:3)+HCOO	C43 H77 O13 S1	833.509	6.3099	0.361115	1.8456e+07	2.35442e+07	2.91417e+07	2.83374e+07	1.14844e+07
	SQMG(33:4)+HCOO	C43 H75 O13 S1	831.493	5.80701	0.145849	3.32863e+07	2.90928e+07	5.74351e+07	4.5642e+07	1.68743e+07
	SQMG(40:1)+HCOO	C50 H95 O13 S1	935.65	14.4383	0.112572	2.97047e+06	2.6683e+06	3.33447e+06	2.27576e+06	1.76793e+06
Sphingolipids
Cer	Cer(d31:0)+H	C31 H64 O3 N1	498.488	8.1828	8.2215e-12	9.4422e+06	9.39101e+06	4.82395e+06	5.51355e+06	1.00806e+07
	Cer(d40:1+pO)+HCOO	C41 H80 O6 N1	682.599	12.581	0.000115626	1.1539e+06	1.19504e+06	1.62827e+06	3.16585e+06	821127
	Cer(d41:0+pO+O)-H	C41 H82 O5 N1	668.62	13.9391	0.0298568	5.50833e+06	3.65556e+06	6.9864e+06	1.84421e+07	5.40723e+06
	Cer(d42:1+hO+O)-H	C42 H82 O5 N1	680.62	13.1718	3.78185e-10	679996	602106	975343	2.93269e+06	641000
	Cer(d32:0)+H	C32 H66 O3 N1	512.504	8.86885	4.23878e-14	5.48028e+09	5383984538	2623406978	3.25266e+09	5.57204e+09
	Cer(d32:0)+H	C32 H66 O3 N1	512.504	10.3309	0.0321984	1.56468e+07	1.99796e+07	1.76036e+07	3.13227e+07	2.4381e+07
	Cer(d45:0+pO)+HCOO	C46 H92 O6 N1	754.693	16.9873	0.000327279	3.23272e+06	3.51237e+06	4.64913e+06	8.26251e+06	2.36006e+06
	Cer(d47:0+pO)+HCOO	C48 H96 O6 N1	782.724	18.3275	8.13148e-05	2.77419e+06	2.98463e+06	3.71794e+06	7.8643e+06	2.29664e+06
	Cer(d47:1+pO)+HCOO	C48 H94 O6 N1	780.709	16.9387	0.000816206	1.604e+06	1.62175e+06	2.4067e+06	3.80968e+06	977358
	Cer(d48:1+pO)+HCOO	C49 H96 O6 N1	794.724	17.5946	0.000222657	2.60508e+06	2.69311e+06	3.91262e+06	6.54316e+06	1.75574e+06
	Cer(d50:0+pO)+HCOO	C51 H102 O6 N1	824.771	20.303	0.00421886	1.49703e+06	1.72693e+06	2.06248e+06	3.96997e+06	1.51265e+06
	Cer(d32:0+O)+H	C32 H66 O4 N1	528.499	9.47081	1.61804e-06	9.59713e+06	1.35166e+07	1.87267e+07	3.63853e+07	2.52694e+07
	Cer(d32:0+pO)+H	C32 H66 O4 N1	528.499	7.30268	3.63927e-06	2.57193e+07	2.80051e+07	1.11204e+07	1.98368e+07	3.22278e+07
	Cer(d32:1)+H	C32 H64 O3 N1	510.488	7.71154	2.70947e-11	3.62692e+07	3.7933e+07	1.7524e+07	2.08832e+07	3.83175e+07
	Cer(d18:0)+H	C18 H38 O3 N1	316.285	1.9122	2.27039e-15	7.12145e+07	7.48916e+07	3.63479e+07	3.46875e+07	7.26673e+07
	Cer(d33:0)+H	C33 H68 O3 N1	526.519	9.53131	5.59774e-10	3.97667e+07	4.31516e+07	1.77365e+07	3.04646e+07	5.82901e+07
	Cer(d34:0)+H	C34 H70 O3 N1	540.535	10.1993	1.41154e-12	5.52565e+09	5416788288	2793323534	3.3119e+09	5.66341e+09
	Cer(d34:0+O)+H	C34 H70 O4 N1	556.53	8.12981	3.75826e-11	8.1714e+07	8.08213e+07	3.757e+07	5.23774e+07	8.85481e+07
	Cer(d34:0+pO)+H	C34 H70 O4 N1	556.53	8.58215	8.58973e-13	1.71802e+08	1.67959e+08	7.69427e+07	1.00641e+08	1.66148e+08
	Cer(d34:1)+H	C34 H68 O3 N1	538.519	9.00876	9.6896e-17	5.15232e+08	5.46288e+08	2.61712e+08	1.96819e+08	5.36789e+08
	Cer(d34:1+O)+H	C34 H68 O4 N1	554.514	7.79163	0.0276403	9.51764e+06	1.15692e+07	7.63889e+06	7.99905e+06	1.16112e+07
	Cer(d34:1+O)+H	C34 H68 O4 N1	554.514	9.54033	0.00118167	7.90254e+06	1.18277e+07	1.4802e+07	2.47816e+07	1.93143e+07
	Cer(d34:2)+H	C34 H66 O3 N1	536.504	8.06047	0.00238615	8.26199e+07	8.7133e+07	4.63926e+07	8.19824e+07	6.83116e+07
	Cer(d35:0)+H	C35 H72 O3 N1	554.551	10.7847	3.86355e-08	3.04385e+07	3.62653e+07	1.53073e+07	1.94327e+07	4.84419e+07
	Cer(d35:0)+H	C35 H72 O3 N1	554.551	12.4452	1.03214e-06	9.0752e+06	1.07773e+07	4.41274e+06	1.05586e+07	1.96382e+07
	Cer(d26:0+pO)+H	C26 H54 O4 N1	444.405	2.94121	2.98559e-09	5.8708e+07	6.13432e+07	2.74627e+07	3.39441e+07	6.79311e+07
	Cer(d36:0)+H	C36 H74 O3 N1	568.566	11.3769	1.07935e-13	9.59453e+08	9.51358e+08	4.71385e+08	5.4163e+08	9.94923e+08
	Cer(d36:0+pO)+H	C36 H74 O4 N1	584.561	9.8884	1.83441e-12	1.76335e+08	1.76825e+08	8.18396e+07	9.8612e+07	1.79889e+08
	Cer(d36:0+pO+O)+H	C36 H74 O5 N1	600.556	7.944	0.00017086	1.45678e+07	1.20873e+07	5.32611e+06	7.29099e+06	1.26943e+07
	Cer(d36:1)+H	C36 H72 O3 N1	566.551	10.2517	2.57179e-12	4.51546e+07	4.63444e+07	2.14751e+07	2.89834e+07	4.7856e+07
	Cer(d36:1+O)+H	C36 H72 O4 N1	582.546	8.71854	1.88939e-12	1.23468e+07	1.10729e+07	4.88898e+06	7.93034e+06	1.20309e+07
	Cer(d28:0)+H	C28 H58 O3 N1	456.441	6.28347	5.18415e-13	2.50695e+08	2.53616e+08	1.19218e+08	1.47513e+08	2.59417e+08
	Cer(d36:3)+H	C36 H68 O3 N1	562.519	10.2059	2.76415e-08	5.32282e+07	4.15013e+07	1.3539e+07	2.45788e+07	2.62939e+07
	Cer(d38:0)+H	C38 H78 O3 N1	596.598	12.6303	7.61171e-13	3.32892e+08	3.35306e+08	1.67722e+08	1.98539e+08	3.5235e+08
	Cer(d38:0+O)+H	C38 H78 O4 N1	612.593	10.338	2.14445e-12	3.16458e+07	3.1652e+07	1.43286e+07	1.85688e+07	3.34218e+07
	Cer(d38:0+pO)+H	C38 H78 O4 N1	612.593	11.051	5.84548e-13	5.42563e+07	5.12113e+07	2.54805e+07	3.46758e+07	5.49349e+07
	Cer(d38:0+pO+O)+H	C38 H78 O5 N1	628.587	9.11748	9.40301e-10	1.1462e+07	1.18971e+07	5.66951e+06	4.30515e+06	9.93394e+06
	Cer(d38:1)+H	C38 H76 O3 N1	594.582	11.5065	1.28143e-12	1.8365e+08	1.88312e+08	7.36022e+07	7.08106e+07	1.59208e+08
	Cer(d30:0)+H	C30 H62 O3 N1	484.472	7.54823	5.12301e-07	3.72721e+08	2.92823e+08	1.68101e+08	2.00243e+08	409359765
	Cer(d40:0)+H	C40 H82 O3 N1	624.629	13.9929	1.89021e-13	9.18738e+07	8.807e+07	4.10083e+07	4.7719e+07	8.99276e+07
	Cer(d40:0+pO)+H	C40 H82 O4 N1	640.624	12.2391	2.62824e-11	2.03428e+07	2.06458e+07	9.85798e+06	1.3281e+07	2.25266e+07
	Cer(d40:1)+H	C40 H80 O3 N1	622.613	12.7785	0.0105882	3.28862e+07	3.23833e+07	1.65372e+07	4.30008e+07	3.53096e+07
	Cer(d40:2)+H	C40 H78 O3 N1	620.598	11.6316	1.57077e-09	7.94294e+06	8.98019e+06	2.50047e+06	4.31376e+06	9.85011e+06
	Cer(d40:3)+H	C40 H76 O3 N1	618.582	12.6304	3.08902e-09	5.98126e+06	3.93057e+06	901521	5.60714e+06	3.63292e+06
	Cer(d42:0+pO)+H	C42 H86 O4 N1	668.655	15.028	9.09321e-05	1.34306e+06	1.51107e+06	2.12276e+06	4.0755e+06	3.0364e+06
	Cer(d42:0+pO+O)+H	C42 H86 O5 N1	684.65	14.5599	0.00173311	6.64247e+06	7.67112e+06	1.11914e+07	1.72677e+07	1.48475e+07
	Cer(d43:0+pO+O)+H	C43 H88 O5 N1	698.666	15.204	0.00395608	1.0716e+06	1.2823e+06	1.79232e+06	2.85955e+06	2.38925e+06
	Cer(d44:0+pO)+H	C44 H90 O4 N1	696.686	16.3447	5.11185e-06	759940	1.11381e+06	1.29379e+06	2.61054e+06	1.6323e+06
	Cer(d44:0+pO+O)+H	C44 H90 O5 N1	712.681	15.8977	3.51518e-05	879869	1.12267e+06	1.974e+06	3.40563e+06	2.44889e+06
	Cer(d54:1+hO+O)+H	C54 H108 O5 N1	850.822	9.96353	2.29439e-06	9.12819e+06	1.35332e+07	2.31395e+07	1.98108e+07	1.6977e+07
	Cer(d56:0+pOEO)+H	C56 H112 O6 N1	894.848	9.45957	2.01553e-08	1.11412e+07	1.69534e+07	2.80886e+07	2.94128e+07	1.89898e+07
	Cer(d30:0+pO)+H	C30 H62 O4 N1	500.467	6.09054	2.54983e-05	2.87506e+07	2.54006e+07	1.36824e+07	1.63116e+07	3.06791e+07
	Cer(d30:1)+H	C30 H60 O3 N1	482.457	6.46952	3.03801e-10	1.87717e+07	1.89026e+07	9.35187e+06	1.30676e+07	2.01682e+07
	Cer(d30:3)+H	C30 H56 O3 N1	478.425	6.29893	4.19042e-09	6.25935e+06	6.14256e+06	2.81134e+06	3.23429e+06	6.18067e+06
	Cer(d33:1)+HCOO	C34 H66 O5 N1	568.495	6.05401	0.133425	2.42561e+07	3.03378e+07	3.59922e+07	2.46963e+07	1.28006e+07
	Cer(d34:1)+HCOO	C35 H68 O5 N1	582.51	10.4096	0.890695	7.38847e+07	7.75172e+07	8.29036e+07	8.70938e+07	5.013e+07
	Cer(d34:1+hO)-H	C34 H66 O4 N1	552.5	9.56873	0.815538	2.3289e+07	2.39116e+07	2.66805e+07	2.57116e+07	1.59237e+07
	Cer(d34:1+pO)+HCOO	C35 H68 O6 N1	598.505	6.78554	0.585321	8.98079e+06	1.20169e+07	1.1024e+07	1.01919e+07	4.00494e+06
	Cer(d34:2)+HCOO	C35 H66 O5 N1	580.495	10.5178	0.901051	6.60763e+06	7.79671e+06	8.22337e+06	8.90751e+06	3.81074e+06
	Cer(d34:2+hO)+HCOO	C35 H66 O6 N1	596.49	6.88058	0.751577	5.82153e+06	7.35395e+06	6.81783e+06	6.93186e+06	2.63167e+06
	Cer(d34:2+hO+O)-H	C34 H64 O5 N1	566.479	6.11433	0.241872	1.56859e+07	1.83223e+07	1.97325e+07	1.5768e+07	7.7534e+06
	Cer(d36:2+O)-H	C36 H68 O4 N1	578.515	9.741	0.57197	6.07193e+06	4.96371e+06	6.23076e+06	5.62014e+06	3.58341e+06
	Cer(d40:0+pO)+HCOO	C41 H82 O6 N1	684.615	13.7705	0.11452	5.29052e+06	5.04209e+06	8.46958e+06	1.39847e+07	4.26646e+06
	Cer(d31:0+O)+H	C31 H64 O4 N1	514.483	7.57741	0.108663	1.26943e+07	2.57168e+07	1.46586e+07	2.27202e+07	2.36235e+07
	Cer(d41:0+pO)+HCOO	C42 H84 O6 N1	698.63	14.3877	0.189657	4.03318e+06	3.35436e+06	5.37041e+06	9.64486e+06	3.0547e+06
	Cer(d42:0+pO)+HCOO	C43 H86 O6 N1	712.646	15.031	0.215562	1.37078e+07	1.20914e+07	2.24972e+07	2.938e+07	9.35302e+06
	Cer(d42:0+pO+O)-H	C42 H84 O5 N1	682.635	14.553	0.206877	3.0804e+07	2.48699e+07	5.30484e+07	6.17873e+07	2.30645e+07
	Cer(d42:1)+HCOO	C43 H84 O5 N1	694.635	15.8045	0.848757	5.14778e+06	5.51068e+06	6.31362e+06	6.74278e+06	6.69542e+06
	Cer(d42:1+hO)+HCOO	C43 H84 O6 N1	710.63	13.7344	0.176326	4.20377e+06	4.00956e+06	6.16638e+06	9.57519e+06	3.24263e+06
	Cer(d42:1+hO+O)-H	C42 H82 O5 N1	680.62	13.948	0.100214	2.44276e+06	2.37128e+06	5.04584e+06	7.61921e+06	3.21629e+06
	Cer(d43:0+pO)+HCOO	C44 H88 O6 N1	726.662	15.6917	0.286913	4.61713e+06	4.32033e+06	7.39297e+06	1.02829e+07	3.29385e+06
	Cer(d43:0+pO+O)-H	C43 H86 O5 N1	696.651	15.1832	0.315605	5.44943e+06	4.57923e+06	9.54476e+06	1.16509e+07	3.95276e+06
	Cer(d43:1+hO)+HCOO	C44 H86 O6 N1	724.646	14.3584	0.430205	2.68123e+06	2.68479e+06	3.89756e+06	6.67835e+06	2.01052e+06
	Cer(d44:0+pO)+HCOO	C45 H90 O6 N1	740.677	16.3467	0.439815	7.09816e+06	6.97082e+06	1.12317e+07	1.43823e+07	4.75382e+06
	Cer(d44:0+pO+O)-H	C44 H88 O5 N1	710.667	15.821	0.304806	3.83937e+06	3.64409e+06	7.92675e+06	7.54468e+06	2.88728e+06
	Cer(d44:1+O)+HCOO	C45 H88 O6 N1	738.662	14.976	0.418944	5.76268e+06	5.78389e+06	8.29804e+06	1.17506e+07	3.74852e+06
	Cer(d44:1+hO+O)-H	C44 H86 O5 N1	708.651	14.3671	0.677439	1.56213e+06	1.54946e+06	2.00545e+06	3.50834e+06	1.07033e+06
	Cer(d45:1+hO)+HCOO	C46 H90 O6 N1	752.677	15.612	0.736343	2.32487e+06	2.35486e+06	3.2277e+06	4.7845e+06	1.46306e+06
	Cer(d46:0+pO)+HCOO	C47 H94 O6 N1	768.709	17.6647	0.853236	5.83866e+06	6.23274e+06	7.73524e+06	1.5099e+07	4.51768e+06
	Cer(d46:1+O)+HCOO	C47 H92 O6 N1	766.693	16.261	0.758517	4.00974e+06	4.03774e+06	5.89181e+06	7.76239e+06	2.44273e+06
	Cer(d48:0+pO)+HCOO	C49 H98 O6 N1	796.74	19.0065	0.831096	3.71312e+06	4.04454e+06	4.87752e+06	9.03861e+06	3.17006e+06
	Cer(d34:1)+H	C34 H68 O3 N1	538.519	10.3882	0.312379	2.50469e+07	3.68284e+07	3.13779e+07	5.06749e+07	4.21734e+07
	Cer(d34:1+O)+H	C34 H68 O4 N1	554.514	7.43906	0.249593	4.34736e+06	5.93586e+06	4.96178e+06	4.86722e+06	6.87757e+06
	Cer(d34:2)+H	C34 H66 O3 N1	536.504	6.77255	0.216565	1.69881e+06	3.34247e+06	3.08835e+06	4.54365e+06	3.80422e+06
	Cer(d34:2+O)+H	C34 H66 O4 N1	552.499	6.05694	0.0769882	3.54724e+06	8.02157e+06	8.29912e+06	9.44836e+06	9.63857e+06
	Cer(d34:2+O)+H	C34 H66 O4 N1	552.499	6.87094	0.2359	2.02316e+06	4.02121e+06	3.55841e+06	5.4417e+06	5.20727e+06
	Cer(d35:4)+H	C35 H64 O3 N1	546.488	8.9453	0.411145	3.1263e+06	7.37826e+06	2.98079e+06	6.42945e+06	3.80602e+06
	Cer(d36:1)+H	C36 H72 O3 N1	566.551	11.4191	0.574286	6.89174e+06	7.36086e+06	7.21677e+06	6.29878e+06	1.03688e+07
	Cer(d36:2)+H	C36 H70 O3 N1	564.535	10.5303	0.0961277	1.32533e+07	1.54762e+07	1.11982e+07	1.10526e+07	1.62676e+07
	Cer(d36:2+O)+H	C36 H70 O4 N1	580.53	8.02198	0.356711	5.94612e+06	8.25765e+06	6.56261e+06	7.45438e+06	1.00085e+07
	Cer(d32:0)+HCOO	C33 H66 O5 N1	556.495	10.3267	0.259673	2.53482e+07	2.75772e+07	3.5142e+07	4.335e+07	2.1016e+07
	Cer(d32:0+O)-H	C32 H64 O4 N1	526.484	9.47723	0.492477	8.44686e+06	7.49915e+06	9.91874e+06	8.6247e+06	5.36625e+06
	Cer(d32:0+pO)+HCOO	C33 H66 O6 N1	572.49	9.47927	0.394544	2.42334e+07	2.32588e+07	2.95491e+07	3.13246e+07	1.59043e+07
CerP	CerP(d30:2)+NH4	C30 H62 O6 N2 P1	577.434	1.95218	1.72254e-06	2.24476e+08	3.03393e+08	6.84367e+08	1.06794e+09	6.77871e+08
	CerP(d30:2)+NH4	C30 H62 O6 N2 P1	577.434	2.31555	0.000130403	1.14174e+09	1928886584	2783734514	4.09766e+09	3.12838e+09
	CerP(d30:2+2O)+H	C30 H59 O8 N1 P1	592.397	2.30127	0.000427099	6.58281e+07	1.12399e+08	1.41572e+08	2.29112e+08	1.59477e+08
	CerP(d30:2+O)+NH4	C30 H62 O7 N2 P1	593.429	1.81891	3.06076e-07	2.43553e+09	3.73824e+09	7.48598e+09	1.26524e+10	7.09045e+09
	CerP(d30:2+O)+H	C30 H59 O7 N1 P1	576.402	2.38473	3.38985e-06	2.00943e+07	3.11919e+07	4.98694e+07	1.08854e+08	5.94124e+07
	CerP(d30:3+pO)+NH4	C30 H60 O7 N2 P1	591.413	1.97292	0.000371066	2.13065e+07	3.39271e+07	5.55002e+07	8.38812e+07	5.64238e+07
	CerP(d29:1+hO)+H	C29 H59 O7 N1 P1	564.402	2.31069	0.351569	2.3856e+07	3.32505e+07	3.0077e+07	2.60006e+07	4.55342e+07
	CerP(d29:1+hO)+H	C29 H59 O7 N1 P1	564.402	2.57665	0.17983	1.23026e+07	1.65414e+07	1.78379e+07	2.51497e+07	2.20084e+07
	CerP(d30:3+pO)+NH4	C30 H60 O7 N2 P1	591.413	2.45533	0.317369	3.4301e+07	4.04845e+07	5.50161e+07	5.31605e+07	5.60297e+07
	CerP(d32:3+2O)+NH4	C32 H64 O8 N2 P1	635.439	2.048	0.0845644	6.32244e+07	8.69167e+07	1.13701e+08	1.47578e+08	1.27542e+08
	CerP(d34:3)+Na	C34 H64 O6 N1 P1 Na1	636.436	2.05346	0.0604679	5.64395e+07	7.79102e+07	1.00821e+08	1.29462e+08	1.10969e+08
	CerP(d35:3)+Na	C35 H66 O6 N1 P1 Na1	650.452	2.099	0.103151	4.39939e+06	7.10914e+06	9.19961e+06	1.15436e+07	9.32702e+06
GM3	GM3(d28:0+O)+H	C51 H95 O22 N2	1087.64	8.41675	2.91717e-10	2.11316e+07	2.38085e+07	7.06767e+07	1.11218e+08	7.31033e+07
	GM3(d29:1+pO)+H	C52 H95 O22 N2	1099.64	8.56215	3.33863e-12	1.52731e+07	1.99857e+07	4.60695e+07	1.53528e+08	7.46222e+07
	GM3(d30:0+O)+H	C53 H99 O22 N2	1115.67	9.55406	7.94194e-14	7.88121e+07	9.19811e+07	2.12831e+08	5.10985e+08	2.99173e+08
	GM3(d30:1+hO)+H	C53 H97 O22 N2	1113.65	8.84342	8.24142e-16	9.4734e+07	1.26109e+08	2.95469e+08	1.19366e+09	4.60264e+08
	GM3(d30:2+O)+H	C53 H95 O22 N2	1111.64	7.85801	7.20556e-16	1.2348e+08	1.52652e+08	5.35797e+08	2.31841e+09	1.04667e+09
	GM3(d31:2+O)+H	C54 H97 O22 N2	1125.65	8.79482	1.72322e-10	4.62439e+06	5.48553e+06	1.19357e+07	3.51217e+07	2.03177e+07
	GM3(d32:0+O)+H	C55 H103 O22 N2	1143.7	10.4192	1.09817e-09	4.89853e+06	3.86705e+06	7.37652e+06	1.98848e+07	1.01177e+07
	GM3(d32:1+O)+H	C55 H101 O22 N2	1141.68	9.68717	4.43011e-10	5.99375e+06	6.93443e+06	1.77454e+07	4.96331e+07	2.333e+07
	GM3(d32:2+O)+H	C55 H99 O22 N2	1139.67	8.93251	2.17705e-14	1.41803e+07	1.56128e+07	4.45154e+07	1.70088e+08	6.66687e+07
	GM3(d32:3+hO)+H	C55 H97 O22 N2	1137.65	8.09796	4.4462e-15	9.05054e+06	1.12161e+07	4.35966e+07	2.56406e+08	8.6282e+07
	GM3(d32:4+hO)+H	C55 H95 O22 N2	1135.64	7.30435	1.54071e-16	7.82727e+06	9.7943e+06	4.78216e+07	341453390	9.1625e+07
	GM3(d29:0+O)+H	C52 H97 O22 N2	1101.65	9.485	0.379639	5.25487e+07	4.4239e+07	5.70926e+07	5.32947e+07	6.31597e+07
So	So(d16:1)+H	C16 H34 O2 N1	272.258	2.00171	8.57781e-17	1.3626e+08	1.37444e+08	6.43892e+07	6.74252e+07	1.38104e+08
	So(d17:0+pO)+H	C17 H38 O3 N1	304.285	2.08816	3.09749e-07	3.77466e+07	3.90184e+07	1.47305e+07	3.59511e+07	4.66686e+07
	So(d17:1)+H	C17 H36 O2 N1	286.274	2.22822	7.42678e-08	3.80313e+07	4.10353e+07	1.91343e+07	3.81338e+07	6.22058e+07
	So(d17:1)+H	C17 H36 O2 N1	286.274	2.53247	1.42402e-07	2.3108e+07	2.54687e+07	1.10403e+07	2.55383e+07	4.50968e+07
	So(d20:0+pO)+H	C20 H44 O3 N1	346.332	2.18266	7.36625e-13	8.07731e+08	8.11731e+08	3.81312e+08	4.20623e+08	7.91149e+08
	So(d20:1)+H	C20 H42 O2 N1	328.321	3.40888	3.68023e-11	6.23277e+06	6.17264e+06	3.13534e+06	3.20157e+06	6.98813e+06
Prenol lipids
Co	Co(Q10)+NH4	C59 H94 O4 N1	880.718	17.5477	2.82486e-06	6.36442e+06	1.09736e+07	2.16672e+07	2.89735e+07	1.88208e+07
	Co(Q10)+H	C59 H91 O4	863.691	17.8967	1.16069e-06	9.91152e+07	1.72215e+08	2.95326e+08	4.53332e+08	2.8746e+08
	Co(Q10)+NH4	C59 H94 O4 N1	880.718	17.8967	1.35209e-06	2.22812e+08	3.86639e+08	6.40004e+08	1.00748e+09	6.377e+08
	Co(Q9)+H	C54 H83 O4	795.629	15.9288	3.59761e-06	2.35547e+06	4.87361e+06	7.56689e+06	1.15789e+07	7.8341e+06
	Co(Q9)+NH4	C54 H86 O4 N1	812.655	15.9288	3.68583e-06	4.09556e+06	8.49961e+06	1.2753e+07	2.00525e+07	1.28931e+07
Fatty Acyls
WE	WE(20:0)+NH4	H44 C20 O2 N1	330.337	2.889	1.55018e-13	1.09953e+09	1.09598e+09	5.33869e+08	5.7302e+08	1.16574e+09
	WE(22:3)+NH4	H42 C22 O2 N1	352.321	3.30351	8.36868e-06	5.95231e+06	6.06828e+06	3.08163e+06	7.62995e+06	1.15893e+07
	WE(26:2)+H	H49 C26 O2	393.373	3.45408	0.000567423	5.33272e+06	8.83057e+06	1.03152e+07	1.22499e+07	1.04731e+07
	WE(27:5)+H	H45 C27 O2	401.341	5.54947	0.0120775	3.48841e+06	5.86876e+06	5.40003e+06	3.3146e+06	6.93145e+06
	WE(27:6)+H	H43 C27 O2	399.326	4.951	0.039755	1.26254e+07	2.53896e+07	2.3054e+07	1.74567e+07	2.79205e+07
	WE(35:4)+H	H63 C35 O2	515.482	23.7042	1.31805e-10	3.89622e+06	5.41208e+06	8.71582e+06	1.19669e+07	7.64425e+06
	WE(37:4)+H	H67 C37 O2	543.514	24.1609	1.01346e-10	3.00658e+06	3.92016e+06	5.91406e+06	9.23555e+06	5.33663e+06
	WE(43:9)+H	H69 C43 O2	617.529	6.964	5.38715e-06	6.00995e+07	1.23092e+08	1.49179e+08	2.01582e+07	1.35203e+08
	WE(44:5)+NH4	H82 C44 O2 N1	656.634	19.037	1.23682e-08	934834	1.80514e+06	2.42471e+06	4.06877e+06	2.24289e+06
	WE(45:6)+H	H79 C45 O2	651.607	14.657	1.81323e-06	3.94136e+06	8.29843e+06	8.8557e+06	1.36466e+07	1.10915e+07
	WE(26:2)+H	H49 C26 O2	393.373	4.26598	0.0910133	1.09615e+07	1.40391e+07	1.58467e+07	1.72825e+07	2.02196e+07

## Sheet: S2
Table S2 The predicts evaluation parameters of OPLS-DA model
Type	A	N	R2X(cum)	R2Y(cum)	Q2(cum)	Title
OPLS-DA	1+1	16	0.501	0.846	0.497	B_vs_A
OPLS-DA	1+2	16	0.606	0.997	0.95	C_vs_A
OPLS-DA	1+1	16	0.745	0.994	0.986	D_vs_A
OPLS-DA	1+1	16	0.535	0.99	0.953	C_vs_B
OPLS-DA	1+1	16	0.758	0.995	0.991	D_vs_B
OPLS-DA	1+2	16	0.763	0.994	0.975	D_vs_C

## Sheet: S3
Table S3 The lipids with significant differences of N. flagelliforme between LB and LA during drought stress . VIP > 1 and p value < 0.05 were applied to determine these ignificantly different lipids.
Name	LipidGroup	IonFormula	CalMz	RT-(min)	Fold Change	P-value	VIP
Glycerolipids
DG	DG(29:1)+Na	C32 H60 O5 Na1	547.433	7.98566	1.7317	0.000414585	9.10624
	DG(31:4)+NH4	C34 H62 O5 N1	564.462	7.98348	1.67028	0.000738193	4.30751
	DG(33:4)+NH4	C36 H66 O5 N1	592.494	9.11632	1.68668	0.00436537	2.28166
	DG(34:4)+NH4	C37 H68 O5 N1	606.509	9.01208	1.42009	0.0112891	2.16777
	DG(30:1)+Na	C33 H62 O5 Na1	561.449	8.97825	1.94321	0.00128432	1.84418
	DG(36:4)+NH4	C39 H72 O5 N1	634.541	10.0548	1.6789	0.0046756	1.61084
	DG(35:5)+NH4	C38 H68 O5 N1	618.509	8.213	2.9646	0.000518468	1.50348
	DG(33:6)+NH4	C36 H62 O5 N1	588.462	7.375	6.09588	0.000429218	1.49412
	DG(29:1)+Na	C32 H60 O5 Na1	547.433	11.9386	1.63521	0.0013735	1.11069
	DG(34:4)+NH4	C37 H68 O5 N1	606.509	10.0381	2.30281	0.0019571	1.10942
	DG(33:4)+NH4	C36 H66 O5 N1	592.494	7.97465	1.10707	0.00789525	1.08781
	DG(33:4)+NH4	C36 H66 O5 N1	592.494	8.767	1.83354	0.000231435	1.02781
	DG(32:4)+NH4	C35 H64 O5 N1	578.478	8.975	1.95706	0.00143115	1.82491
TG	TG(33:3p)+H	C36 H63 O5	575.467	9.122	1.6616	0.00429137	4.20231
	TG(33:6e)+H	C36 H59 O5	571.436	7.38511	5.64146	0.000314118	2.04332
	TG(35:5)+NH4	C38 H66 O6 N1	632.488	4.22855	1.94678	0.00247148	1.71509
	TG(35:4)+NH4	C38 H68 O6 N1	634.504	4.96749	2.00241	0.00130514	1.66107
	TG(33:5p)+H	C36 H59 O5	571.436	4.949	2.07641	0.00186125	1.5964
	TG(54:2)+NH4	C57 H110 O6 N1	904.833	21.6963	0.930539	0.020181	1.46531
	TG(33:6)+NH4	C36 H60 O6 N1	602.442	5.94171	1.59623	0.00111147	1.39652
	TG(33:5e)+H	C36 H61 O5	573.451	7.95064	5.17642	0.000107541	1.30191
	TG(36:5)+NH4	C39 H68 O6 N1	646.504	5.40043	2.23367	0.0018184	1.22311
	TG(34:3p)+H	C37 H65 O5	589.483	10.029	2.28438	0.00251316	1.20373
	TG(33:5)+NH4	C36 H62 O6 N1	604.457	4.26297	2.22686	0.00151443	1.19807
	TG(32:2p)+H	C35 H63 O5	563.467	9.50353	2.31683	0.000685108	1.09978
	TG(33:4e)+H	C36 H63 O5	575.467	8.82638	1.81129	0.00147377	1.11653
Glycerophospholipids
PC	PC(36:2)+H	C44 H85 O8 N1 P1	786.601	10.7608	0.677669	0.0365521	4.13047
	PC(36:2)+HCOO	C45 H85 O10 N1 P1	830.592	10.7752	0.539775	0.00207109	3.96288
	PC(34:2)+HCOO	C43 H81 O10 N1 P1	802.56	9.86152	0.498042	0.00124554	1.80676
	PC(36:2)+Na	C44 H84 O8 N1 P1 Na1	808.583	10.7608	0.587099	0.00233895	1.32916
	PC(34:1)+H	C42 H83 O8 N1 P1	760.585	10.7391	0.591524	0.0322039	1.13203
	PC(37:2)+H	C45 H87 O8 N1 P1	800.616	11.3486	0.455122	0.00362783	1.08635
	PC(34:2)+H	C42 H81 O8 N1 P1	758.569	9.85047	0.63337	0.0326088	1.72074
PE	PE(36:2)-H	C41 H77 O8 N1 P1	742.539	11.0637	0.536628	0.00404102	4.03126
	PE(34:2)-H	C39 H73 O8 N1 P1	714.508	10.1616	0.484806	0.00180655	3.01979
	PE(36:2)+H	C41 H79 O8 N1 P1	744.554	11.054	0.680237	0.00701188	1.6048
	PE(34:1)-H	C39 H75 O8 N1 P1	716.524	11.0363	0.513118	0.00721073	1.26285
	PE(34:2)+H	C39 H75 O8 N1 P1	716.522	10.1485	0.680358	0.0130169	1.07588
PG	PG(37:2)-H	C43 H80 O10 N0 P1	787.549	10.4107	0.397234	0.004901	1.15971
PS	PS(38:4)-H	C44 H77 O10 N1 P1	810.529	11.0711	0.61821	0.000808368	1.26546
	PS(37:0)-H	C43 H83 O10 N1 P1	804.576	10.742	0.487635	0.00324428	1.22242
	PS(40:1)-H	C46 H87 O10 N1 P1	844.607	11.2605	0.393039	0.00832828	1.19448
	PS(36:4)-H	C42 H73 O10 N1 P1	782.498	10.1603	0.499031	0.000210657	1.03596
LPE	LPE(16:1)-H	C21 H41 O7 N1 P1	450.263	2.38701	0.631724	0.0271118	1.36397
	MGDG(34:1)+HCOO	C44 H81 O12	801.573	11.463	0.602148	0.0299341	2.97954
	MGDG(34:4)+HCOO	C44 H75 O12	795.526	9.05166	0.629254	0.0165456	2.87269
	MGDG(36:1)+HCOO	C46 H85 O12	829.605	12.4736	0.600689	0.019594	1.49295
	MGDG(37:2)+HCOO	C47 H85 O12	841.605	11.9107	0.502371	0.0163075	1.31879
	MGDG(34:1)+HCOO	C44 H81 O12	801.573	10.6926	0.57801	0.0140755	1.18699
	MGDG(32:1)+HCOO	C42 H77 O12	773.542	10.5448	0.658995	0.0444544	1.20081
Saccharolipids
MGMG	MGMG(18:3)+HCOO	C28 H47 O11	559.312	2.45122	0.489312	0.0213138	1.01743
SQDG	SQDG(40:7)+HCOO	C50 H81 O14 S1	937.535	11.5267	1.45452	0.0472863	9.07345
	SQDG(40:7)+HCOO	C50 H81 O14 S1	937.535	12.0537	2.50047	0.044966	5.1639
	SQDG(33:3)+HCOO	C43 H75 O14 S1	847.488	5.92537	0.47557	0.0228621	1.29104
SQMG	SQMG(18:1)-H	C27 H49 O11 S1	581.3	2.48486	2.44434	0.00991213	1.23384
	SQMG(16:0)-H	C25 H47 O11 S1	555.284	2.36274	1.98653	0.00460103	5.24087

## Sheet: S4
Table S4 The lipids with significant differences of N. flagelliforme between LC and LA during drought stress . VIP > 1 and p value < 0.05 were applied to determine these ignificantly different lipids.
Name	LipidGroup	IonFormula	CalMz	RT-(min)	Fold Change	P-value	VIP
Glycerolipids
DG	DG(33:3)+NH4	C36 H68 O5 N1	594.509	9.08234	0.690844	0.000821415	2.65451
	DG(34:4)+NH4	C37 H68 O5 N1	606.509	9.01208	1.63684	0.00525338	1.93367
	DG(33:6)+NH4	C36 H62 O5 N1	588.462	7.375	15.8822	0.00319185	1.69695
	DG(35:5)+NH4	C38 H68 O5 N1	618.509	8.213	5.25461	0.000444295	1.50324
	DG(36:6)+NH4	C39 H68 O5 N1	630.509	8.46216	12.0839	0.00973801	1.44712
	DG(30:1)+Na	C33 H62 O5 Na1	561.449	8.97825	2.08731	0.000511569	1.31388
	DG(32:4)+NH4	C35 H64 O5 N1	578.478	8.975	2.10742	0.000559103	1.31016
	DG(36:4)+NH4	C39 H72 O5 N1	634.541	10.0548	1.65949	0.0283288	1.10103
	DG(34:3)+NH4	C37 H70 O5 N1	608.525	9.51493	1.48513	0.0253705	1.03118
	DG(32:1)+Na	C35 H66 O5 Na1	589.48	9.04803	6.55211	0.00662077	1.00349
TG	TG(33:6e)+H	C36 H59 O5	571.436	7.38511	15.0129	0.00225962	2.36211
	TG(35:5)+NH4	C38 H66 O6 N1	632.488	4.22855	3.24111	0.00126764	1.6572
	TG(35:4)+NH4	C38 H68 O6 N1	634.504	4.96749	3.13582	0.00165098	1.5943
	TG(33:5e)+H	C36 H61 O5	573.451	7.95064	11.8467	0.00108927	1.39101
	TG(54:4)+H	C57 H103 O6	883.775	22.3439	0.884386	5.77943e-05	1.17028
	TG(36:5)+NH4	C39 H68 O6 N1	646.504	5.40043	3.39531	0.000472355	1.10598
	TG(54:5)+H	C57 H101 O6	881.759	21.692	0.797413	5.54282e-07	1.06464
Glycerophospholipids
PC	PC(36:2)+H	C44 H85 O8 N1 P1	786.601	10.7608	0.278026	2.26865e-06	3.7413
	PC(36:2)+HCOO	C45 H85 O10 N1 P1	830.592	10.7752	0.382922	9.07364e-05	3.57974
	PC(35:1)+H	C43 H85 O8 N1 P1	774.601	11.4892	4.10242	0.00206656	2.0085
	PC(34:2)+HCOO	C43 H81 O10 N1 P1	802.56	9.86152	0.410664	0.000109493	1.56349
	PC(34:2)+H	C42 H81 O8 N1 P1	758.569	9.85047	0.343148	5.38736e-05	1.41123
	PC(36:2)+Na	C44 H84 O8 N1 P1 Na1	808.583	10.7608	0.243555	5.0971e-06	1.11856
	PC(33:2)+H	C41 H79 O8 N1 P1	744.554	9.34098	4.3387	0.011095	1.05114
	PC(33:1)+H	C41 H81 O8 N1 P1	746.569	10.0378	4.65453	0.00147444	1.02004
PE	PE(36:2)-H	C41 H77 O8 N1 P1	742.539	11.0637	0.562015	0.00402668	3.42606
	PE(34:2)-H	C39 H73 O8 N1 P1	714.508	10.1616	0.483155	0.000596738	2.49891
	PE(36:2)+H	C41 H79 O8 N1 P1	744.554	11.054	0.479236	0.00011042	1.26241
	PE(34:1)-H	C39 H75 O8 N1 P1	716.524	11.0363	0.653173	0.0179347	1.00903
PG	PG(34:1)-H	C40 H76 O10 N0 P1	747.518	9.95887	1.82148	0.0360474	1.10835
PI	PI(40:5)+NH4	C49 H89 O13 N1 P1	930.607	8.28024	7.01417	0.00410283	1.47757
PS	PS(38:4)-H	C44 H77 O10 N1 P1	810.529	11.0711	0.497351	0.000107318	1.16929
LPC	LPC(18:1)+H	C26 H53 O7 N1 P1	522.355	2.93003	5.53214	1.15438e-07	3.02233
	LPC(18:1)+HCOO	C27 H53 O9 N1 P1	566.346	2.9399	5.46631	1.12266e-06	2.64782
	LPC(16:1)+H	C24 H49 O7 N1 P1	494.324	2.28643	3.23639	1.55828e-11	1.43055
LPE	LPE(18:1)-H	C23 H45 O7 N1 P1	478.294	3.09494	3.73758	3.95672e-06	1.57488
LPG	LPG(16:0)-H	C22 H44 O9 N0 P1	483.273	2.46646	19.3528	0.000159519	4.72561
	LPG(18:1)-H	C24 H46 O9 N0 P1	509.288	2.5669	8.70738	2.94301e-06	2.75139
Saccharolipids
DGDG	DGDG(34:4)+Na	C49 H84 O15 Na1	935.57	8.28244	3.76199	0.000893115	2.15188
	DGDG(34:4)+HCOO	C50 H85 O17	957.579	8.28856	4.3122	0.00074859	1.88918
	DGDG(36:6)+H	C51 H85 O15	937.588	9.27246	3.35936	0.000476077	1.43881
	DGDG(48:14)+HCOO	C64 H93 O17	1133.64	7.86046	3.84705	0.00022596	1.41794
	DGDG(47:14)+HCOO	C63 H91 O17	1119.63	7.75467	3.93433	0.00039582	1.08734
	DGDG(34:3)+HCOO	C50 H87 O17	959.595	9.08455	3.91301	0.00257997	1.0341
DGMG	DGMG(16:0)+HCOO	C32 H59 O16	699.381	2.83592	14.6378	0.00888617	2.24581
	DGMG(16:1)+HCOO	C32 H57 O16	697.365	2.2621	14.2963	0.00799115	1.90611
	DGMG(18:1)+HCOO	C34 H61 O16	725.397	2.95111	11.2236	0.00645516	1.10753
	DGMG(30:10)+HCOO	C46 H67 O16	875.443	2.64153	10.5119	0.000531077	1.00762
MGDG	MGDG(36:6)+HCOO	C46 H75 O12	819.526	9.45841	1.90929	9.30231e-05	3.37319
	MGDG(36:7)+HCOO	C46 H73 O12	817.511	8.697	3.53782	0.000155699	3.06873
	MGDG(34:4)+Na	C43 H74 O10 Na1	773.517	9.02658	2.92379	0.00219142	2.58805
	MGDG(34:4)+HCOO	C44 H75 O12	795.526	9.05166	3.65482	0.0105676	2.05891
	MGDG(47:12)+HCOO	C57 H85 O12	961.605	7.06681	0.506179	0.000357165	1.58251
	MGDG(34:1)+HCOO	C44 H81 O12	801.573	11.463	3.03307	0.00156793	1.56582
	MGDG(36:3)+HCOO	C46 H81 O12	825.573	10.8711	1.6142	0.014158	1.39094
	MGDG(34:2)+HCOO	C44 H79 O12	799.558	10.626	3.55289	0.00323869	1.32826
	MGDG(36:6)+H	C45 H75 O10	775.535	10.0124	2.29615	0.00432575	1.30193
	MGDG(34:2)+Na	C43 H78 O10 Na1	777.549	10.577	2.40385	0.00382844	1.22113
	MGDG(36:6)+Na	C45 H74 O10 Na1	797.517	8.46784	3.8303	0.00493389	1.21921
	MGDG(34:3)+Na	C43 H76 O10 Na1	775.533	9.80662	4.13755	0.00288429	1.21591
	MGDG(34:3)+HCOO	C44 H77 O12	797.542	9.84851	4.84951	0.00789127	1.20876
	MGDG(32:0)+HCOO	C42 H79 O12	775.558	10.8906	3.20171	5.07885e-05	1.11358
MGMG	MGMG(16:0)+HCOO	C26 H49 O11	537.328	3.33323	22.3519	0.0154824	6.30056
	MGMG(16:1)+HCOO	C26 H47 O11	535.312	2.60908	18.93	0.0174022	5.39465
	MGMG(18:1)+HCOO	C28 H51 O11	563.344	3.47001	4.70857	0.0098952	1.93241
	MGMG(16:0)-H	C25 H47 O9	491.323	3.33323	24.3235	0.017053	1.24755
	MGMG(16:1)-H	C25 H45 O9	489.307	2.60908	19.3091	0.0180817	1.08864
SQDG	SQDG(40:7)+HCOO	C50 H81 O14 S1	937.535	11.5267	1.54517	0.0121826	3.46674
	SQDG(34:3)-H	C43 H75 O12 S1	815.498	7.95667	1.89879	0.00030244	3.45266
	SQDG(33:3)+HCOO	C43 H75 O14 S1	847.488	5.92537	0.346852	0.0046092	1.22328
	SQDG(32:1)-H	C41 H75 O12 S1	791.498	8.50488	2.41921	0.00142786	1.10884
SQMG	SQMG(16:0)-H	C25 H47 O11 S1	555.284	2.36274	16.6217	7.30319e-07	9.17133
	SQMG(18:1)-H	C27 H49 O11 S1	581.3	2.48486	15.3927	0.000340768	1.65763
	SQMG(33:4)+HCOO	C43 H75 O13 S1	831.493	5.24955	9.64063	0.00156611	1.24028
	SQMG(33:3)+HCOO	C43 H77 O13 S1	833.509	5.931	7.10008	0.00341705	1.01291
Sphingolipids
Cer	Cer(d32:0)+H	C32 H66 O3 N1	512.504	8.86885	0.478699	1.87422e-09	5.31843
	Cer(d34:0)+H	C34 H70 O3 N1	540.535	10.1993	0.50552	2.75384e-08	5.21994
	Cer(d36:0)+H	C36 H74 O3 N1	568.566	11.3769	0.491306	7.69641e-09	2.19505
	Cer(d34:1)+H	C34 H68 O3 N1	538.519	9.00876	0.50795	8.11249e-09	1.60517
	Cer(d30:0)+H	C30 H62 O3 N1	484.472	7.54823	0.45101	4.8469e-06	1.35253
	Cer(d38:0)+H	C38 H78 O3 N1	596.598	12.6303	0.503834	2.32398e-08	1.27972
	Cer(d28:0)+H	C28 H58 O3 N1	456.441	6.28347	0.475552	6.47602e-09	1.1387
	Cer(d38:1)+H	C38 H76 O3 N1	594.582	11.5065	0.400774	1.39818e-10	1.03502
CerP	CerP(d30:2+O)+NH4	C30 H62 O7 N2 P1	593.429	1.81891	3.07366	6.99355e-06	5.94602
	CerP(d30:2)+NH4	C30 H62 O6 N2 P1	577.434	2.31555	2.43816	0.000139828	3.22775
	CerP(d30:2)+NH4	C30 H62 O6 N2 P1	577.434	1.95218	3.04874	5.55815e-06	1.79163
GM3	GM3(d30:2+O)+H	C53 H95 O22 N2	1111.64	7.85801	4.33915	0.000270493	1.70354
	GM3(d30:1+hO)+H	C53 H97 O22 N2	1113.65	8.84342	3.11893	0.000545061	1.14938
So	So(d20:0+pO)+H	C20 H44 O3 N1	346.332	2.18266	0.472077	2.19358e-09	2.05534
Prenol lipids
Co	Co(Q10)+NH4	C59 H94 O4 N1	880.718	17.8967	2.8724	5.508e-07	1.67907
	Co(Q10)+H	C59 H91 O4	863.691	17.8967	2.97963	5.71093e-07	1.15937
Fatty Acyls
WE	WE(20:0)+NH4	H44 C20 O2 N1	330.337	2.889	0.485541	1.27934e-08	2.36718

## Sheet: S5
Table S5 The lipids with significant differences of N. flagelliforme between LD and LA during drought stress . VIP > 1 and p value < 0.05 were applied to determine these ignificantly different lipids.
Name	LipidGroup	IonFormula	CalMz	RT-(min)	Fold Change	P-value	VIP
Glycerolipids
DG	DG(29:1)+Na	C32 H60 O5 Na1	547.433	7.98566	0.494477	0.0322593	4.91617
	DG(33:4)+NH4	C36 H66 O5 N1	592.494	7.97465	0.370861	0.000495679	4.68994
	DG(32:1)+Na	C35 H66 O5 Na1	589.48	9.04803	190.674	3.06457e-13	3.51449
	DG(33:3)+NH4	C36 H68 O5 N1	594.509	9.08234	0.0848584	1.25921e-10	3.05022
	DG(31:4)+NH4	C34 H62 O5 N1	564.462	7.98348	0.453825	0.0153767	2.46901
	DG(32:0)+Na	C35 H68 O5 Na1	591.496	10.0213	192.216	1.03088e-13	2.2741
	DG(36:6)+H	C39 H65 O5	613.483	8.46216	553.615	3.09468e-09	1.90315
	DG(34:4)+H	C37 H65 O5	589.483	8.28475	150.977	1.26833e-10	1.54526
	DG(33:4)+NH4	C36 H66 O5 N1	592.494	9.11632	0.423854	0.00296953	1.31726
	DG(34:2p)+H	C37 H69 O4	577.519	9.97325	18.2804	0.000124183	1.16552
	DG(34:3)+NH4	C37 H70 O5 N1	608.525	9.51493	0.535018	0.0458204	1.1606
	DG(31:3)+NH4	C34 H64 O5 N1	566.478	9.0817	0.226678	1.03642e-05	1.10912
	DG(36:5)+H	C39 H67 O5	615.498	9.25058	467.731	3.12319e-08	1.10307
	DG(36:4)+NH4	C39 H72 O5 N1	634.541	10.0548	0.504526	0.00570703	1.03775
TG	TG(33:3p)+H	C36 H63 O5	575.467	9.122	0.435942	0.00205573	2.45943
	TG(54:5)+H	C57 H101 O6	881.759	21.692	0.876375	0.00374651	1.00147
Glycerophospholipids
PC	PC(35:1)+H	C43 H85 O8 N1 P1	774.601	11.4892	28.7713	9.64598e-09	3.58169
	PC(36:2)+H	C44 H85 O8 N1 P1	786.601	10.7608	2.14051	0.00259426	1.91246
	PC(35:2)+H	C43 H83 O8 N1 P1	772.585	10.0403	54.6553	2.70026e-12	1.87106
	PC(34:2)+H	C42 H81 O8 N1 P1	758.569	9.85047	3.48073	0.00925897	1.33083
PG	PG(36:2)-H	C42 H78 O10 N0 P1	773.534	9.97019	0.615504	0.0142168	2.98751
	PG(34:1)-H	C40 H76 O10 N0 P1	747.518	9.95887	9.20498	0.000537685	1.63013
	PG(34:3)-H	C40 H72 O10 N0 P1	743.487	8.41868	27.6609	0.000520521	1.6254
	PG(38:3)-H	C44 H80 O10 N0 P1	799.549	10.018	47.8321	7.43773e-06	1.26545
PI	PI(40:5)+NH4	C49 H89 O13 N1 P1	930.607	8.28024	131.204	7.60424e-11	4.08432
	PI(54:2)+H	C63 H120 O13 N0 P1	1115.85	13.2227	0.0352617	1.21161e-09	1.59576
PS	PS(45:4)+Na	C51 H92 O10 N1 P1 Na1	932.635	9.26608	87.156	6.16054e-09	2.16012
LPC	LPC(18:1)+H	C26 H53 O7 N1 P1	522.355	2.93003	9.53858	0.0333037	2.18869
	LPC(16:1)+H	C24 H49 O7 N1 P1	494.324	2.28643	7.59209	0.0476625	1.28931
Saccharolipids
DGDG	DGDG(34:4)+HCOO	C50 H85 O17	957.579	8.28856	26.7947	1.24864e-07	3.7335
	DGDG(34:4)+Na	C49 H84 O15 Na1	935.57	8.28244	22.6376	6.87606e-15	3.5773
	DGDG(36:6)+Na	C51 H84 O15 Na1	959.57	7.7181	85.8838	1.86771e-12	2.67343
	DGDG(34:3)+HCOO	C50 H87 O17	959.595	9.08455	25.1228	2.03394e-06	2.32363
	DGDG(36:6)+HCOO	C52 H85 O17	981.579	7.72739	52.1264	2.8846e-06	2.26584
	DGDG(36:6)+H	C51 H85 O15	937.588	9.27246	14.0344	3.47605e-15	1.99926
	DGDG(48:14)+HCOO	C64 H93 O17	1133.64	7.86046	9.91138	6.1806e-11	1.481
	DGDG(32:2)+Na	C47 H84 O15 Na1	911.57	8.85315	18.6507	6.29098e-11	1.47793
	DGDG(34:2)+HCOO	C50 H89 O17	961.611	9.88161	14.5604	0.000985956	1.44778
	DGDG(36:4)+Na	C51 H88 O15 Na1	963.602	9.35553	20.0258	1.15212e-13	1.34838
	DGDG(47:14)+HCOO	C63 H91 O17	1119.63	7.75467	11.4284	1.99009e-06	1.25809
	DGDG(36:4)+HCOO	C52 H89 O17	985.611	9.35547	24.0925	9.23955e-07	1.19209
	DGDG(36:5)+HCOO	C52 H87 O17	983.595	8.52624	38.3229	3.24187e-06	1.1356
	DGDG(48:13)+HCOO	C64 H95 O17	1135.66	8.71903	9.62723	4.27607e-06	1.11514
	DGDG(34:5)+Na	C49 H82 O15 Na1	933.555	7.4401	91.7329	1.3178e-08	1.10776
	DGDG(32:2)+HCOO	C48 H85 O17	933.579	8.86521	14.9832	1.9589e-06	1.07882
	DGDG(50:16)+HCOO	C66 H93 O17	1157.64	7.30776	23.3864	1.14839e-05	1.01198
DGMG	DGMG(18:3)+HCOO	C34 H57 O16	721.365	2.15155	26.3894	0.0447232	1.1691
	DGMG(16:1)+HCOO	C32 H57 O16	697.365	2.2621	14.6935	0.0360627	1.12689
MGDG	MGDG(34:4)+HCOO	C44 H75 O12	795.526	9.05166	39.8568	1.05466e-06	6.58565
	MGDG(34:2)+HCOO	C44 H79 O12	799.558	10.626	43.2314	1.76451e-05	4.93641
	MGDG(36:6)+HCOO	C46 H75 O12	819.526	9.45841	2.65055	0.000766148	4.67895
	MGDG(36:6)+HCOO	C46 H75 O12	819.526	8.48248	51.9223	2.67211e-06	3.48733
	MGDG(34:3)+HCOO	C44 H77 O12	797.542	9.84851	64.0033	7.09303e-06	3.41302
	MGDG(34:1)+HCOO	C44 H81 O12	801.573	11.463	14.5657	4.048e-05	3.30756
	MGDG(34:2)+Na	C43 H78 O10 Na1	777.549	10.577	25.4724	1.31965e-07	3.21289
	MGDG(36:6)+H	C45 H75 O10	775.535	10.0124	17.9353	1.68676e-15	3.14607
	MGDG(36:7)+HCOO	C46 H73 O12	817.511	8.697	9.33079	1.88355e-05	3.07274
	MGDG(36:6)+Na	C45 H74 O10 Na1	797.517	8.46784	46.8593	1.93905e-14	3.07162
	MGDG(34:4)+Na	C43 H74 O10 Na1	773.517	9.02658	7.67037	2.62504e-06	2.70129
	MGDG(34:3)+Na	C43 H76 O10 Na1	775.533	9.80662	41.6823	2.05764e-13	2.64805
	MGDG(36:4)+HCOO	C46 H79 O12	823.558	10.0774	42.5474	4.35135e-06	2.46561
	MGDG(36:5)+Na	C45 H76 O10 Na1	799.533	9.24263	46.3842	2.36652e-12	2.26207
	MGDG(32:2)+Na	C41 H74 O10 Na1	749.517	9.6137	21.1169	2.39386e-13	2.07555
	MGDG(36:4)+Na	C45 H78 O10 Na1	801.549	10.0863	25.3423	5.1223e-13	1.95628
	MGDG(34:1)+Na	C43 H80 O10 Na1	779.564	11.4405	7.09662	3.14828e-08	1.83691
	MGDG(34:5)+Na	C43 H72 O10 Na1	771.502	8.20446	108.172	2.93305e-10	1.68075
	MGDG(34:5)+HCOO	C44 H73 O12	793.511	8.78117	0.150283	0.00406771	1.62103
	MGDG(34:2)+HCOO	C44 H79 O12	799.558	10.0748	12.0601	2.39006e-06	1.47259
	MGDG(32:1)+HCOO	C42 H77 O12	773.542	10.5448	14.7034	2.20446e-05	1.4362
	MGDG(32:1)+Na	C41 H76 O10 Na1	751.533	10.5259	10.8306	6.0598e-14	1.33909
	MGDG(36:3)+Na	C45 H80 O10 Na1	803.564	10.8721	6.40285	4.15987e-12	1.32762
	MGDG(35:1)+HCOO	C45 H83 O12	815.589	12.234	19.454	0.000188974	1.32371
	MGDG(32:0)+HCOO	C42 H79 O12	775.558	10.8906	0.520243	0.0186968	1.28654
	MGDG(47:12)+HCOO	C57 H85 O12	961.605	7.06681	0.535823	0.00465309	1.2223
	MGDG(34:1)+HCOO	C44 H81 O12	801.573	10.6926	16.6477	0.00238574	1.20393
	MGDG(34:0)+Na	C43 H82 O10 Na1	781.58	12.4947	19.171	1.87283e-11	1.12484
	MGDG(36:5)-H	C45 H75 O10	775.537	9.93933	0.621287	0.017232	1.07561
	MGDG(35:2)+HCOO	C45 H81 O12	813.573	11.0995	18.2207	0.00160829	1.07476
	MGDG(36:5)+HCOO	C46 H77 O12	821.542	10.3608	3.54622	0.00115355	1.04049
	MGDG(34:0)+HCOO	C44 H83 O12	803.589	12.5317	12.9045	8.1137e-05	1.02237
SQDG	SQDG(40:7)+HCOO	C50 H81 O14 S1	937.535	11.5267	3.44008	0.000719368	3.15051
	SQDG(32:1)-H	C41 H75 O12 S1	791.498	8.50488	3.22066	0.00381487	1.56634
	SQDG(34:4)-H	C43 H73 O12 S1	813.483	7.00916	33.3674	0.000238168	1.29158
	SQDG(34:3)-H	C43 H75 O12 S1	815.498	7.95667	4.36227	0.000554647	1.27369
	SQDG(35:1)-H	C44 H81 O12 S1	833.545	9.957	3.65105	0.00864665	1.155
Sphingolipids
Cer	Cer(d34:0)+H	C34 H70 O3 N1	540.535	10.1993	0.599369	3.42426e-09	4.05654
	Cer(d32:0)+H	C32 H66 O3 N1	512.504	8.86885	0.593522	1.05138e-09	4.04338
	Cer(d36:0)+H	C36 H74 O3 N1	568.566	11.3769	0.56452	1.16141e-09	1.71138
	Cer(d34:1)+H	C34 H68 O3 N1	538.519	9.00876	0.382001	1.03817e-12	1.35203
	Cer(d30:0)+H	C30 H62 O3 N1	484.472	7.54823	0.537246	8.87885e-05	1.05252
CerP	CerP(d30:2+O)+NH4	C30 H62 O7 N2 P1	593.429	1.81891	5.19494	0.00553132	4.0373
	CerP(d30:2)+NH4	C30 H62 O6 N2 P1	577.434	2.31555	3.58897	0.0143996	1.90457
	CerP(d30:2)+NH4	C30 H62 O6 N2 P1	577.434	1.95218	4.75751	0.00896153	1.13431
GM3	GM3(d30:2+O)+H	C53 H95 O22 N2	1111.64	7.85801	18.7757	9.07798e-13	2.31463
	GM3(d30:1+hO)+H	C53 H97 O22 N2	1113.65	8.84342	12.6001	3.00979e-10	1.59815
So	So(d20:0+pO)+H	C20 H44 O3 N1	346.332	2.18266	0.520746	2.67024e-09	1.60037
Prenol lipids
Co	Co(Q10)+NH4	C59 H94 O4 N1	880.718	17.8967	4.52166	0.0021247	1.14802
Fatty Acyls
WE	WE(20:0)+NH4	H44 C20 O2 N1	330.337	2.889	0.521148	3.08264e-10	1.8691

## Sheet: S6
Table S6 The abbreviations of the lipids and others in text.
Catgories	Abbreviations	Name
Lipids	DG	diglyceride
	TG	triglyceride
	PA	phosphatidic acid
	PC	phosphatidylcholine
	PE	phosphatidylethanolamine
	PG	phosphatidylglycerol
	PI	phosphatidylinositol
	PS	phosphatidylserine
	LPA	lysophosphatidic acid
	LPC	lysophosphatidylcholine
	LPE	lysophosphatidylethanolamine
	LPG	lysophosphatidylglycerol
	DGDG	digalactosyldiacylglycerol
	DGMG	digalactosylmonoacylglycerol
	MGDG	monogalactosyldiacylglycerol
	MGMG	monogalactosylmonoacylglycerol
	SQDG	sulfoquinovosyldiacylglycerol
	SQMG	sulfoquinovosylmonoacylglycerol
	Cer	ceramides
	CerP	ceramides phosphate
	GM3	gangliosides
	So	sphingosine
	WE	wax esters
	Co	coenzyme
	PL	prenol lipids
	SP	sphingolipids
	GL	glycerolipids
	GP	glycerophospholipids
	SL	saccharolipids
	LPs	lysophospholipids
	FA	fatty acid
	OCFAs	odd-chain fatty acids
Enzymes	AAPT	aminoalcohol phosphotransferases
	ACOX1	acyl-CoA oxidase
	ACSL	long-chain acyl-CoA synthetase
	AGPAT	1-acylglycerol-3-phosphate O-acyltransferase
	AH	acetylhydrolase
	CDase	ceramidase
	CDS	CDP-diacylglycerol synthase
	CPT	diacylglycerol cholinephosphotransferase
	DGAT	diacylglycerol O-acyltransferase
	DGD1	digalactosyl diacylglycerol synthase
	DGK5	diacylglycerol kinase
	EK	ethanolamine kinase
	GPAT	glycerol-3-phosphate acyltransferase
	HRP	horseradish peroxidase
	KSR	ketosphinganine reductase
	LCB	sphingolipid Δ8 long-chain base
	LOH	lag1 longevity assurance homolog
	LPCAT	LPC acyltransferase
	MGD1	monogalactosyl diacylglycerol synthase
	PAP	PA phosphatase
	PDAT	phospholipid: diacylglycerol acyltransferase
	PEMT	PE methyltransferase
	PI3K	PI 3-kinase
	PI3P5K	PI-3-phosphate-5-kinase
	PI4K	PI 4-kinase
	PIS1	phosphoinositide synthase
	PLA	phospholipase A
	PLC	phospholipase C
	PLD	phospholipase D
	PSD	PS decarboxylase
	PSS	base-exchange-type phosphatidylserine synthase
	SAT	sphingosine N-acyltransferase
	SPL	sphingosine 1-phosphate lyase
	SQD2	sulfoquinovosyl diacylglycerol synthase
Compounds	G3P	glycerol-3-phosphate
	PIP	PI phosphate
	PIP2	PI bisphosphate
	TMB	tetramethylbenzidine
Others	DELs	differently expressed lipids
	EPS	exopolysaccharides
	ESI	electrospray ionization
	OPLS-DA	orthogonal partial least squares discriminant analysis
	PCA	principal component analysis
	Pn	net photosynthetic rate
	QC	quality control
	ROS	reactive oxygen species
	RSD	relative standard deviation
	SE	standard error
	TIC	total ion chromatogram
	UHPLC	ultra-high-performance liquid chromatography
	VIP	variable importance in the projection
